# Supplementary material
Source: PubMed Central journal article supplement (PMC6467786)
Supplement: NIHMS1002037-supplement-Supporting_Information.pdf [file NIHMS1002037-supplement-Supporting_Information.pdf]

**Supporting Information**  
**Hyperconjugative Aromaticity and Antiaromaticity Control the  
Reactivities and  $\pi$ -Facial Stereoselectivities of 5-Substituted  
Cyclopentadiene Diels-Alder Cycloadditions**

Brian J. Levandowski, Lufeng Zou, and K. N. Houk\*

*Department of Chemistry and Biochemistry, University of California, Los Angeles, CA 90095,  
USA*

Email: houk@chem.ucla.edu

Table of Contents

|                                               |     |
|-----------------------------------------------|-----|
| Figure S1.....                                | S2  |
| Table S1 Optimized Cartesian Coordinates..... | S3  |
| Table S2 Energetic Data.....                  | S60 |

Figure S1 shows the results from the distortion/interaction-activation strain analysis performed along the intrinsic reaction coordinate (IRC) for the *syn* (red) and *anti* (blue) Diels-Alder reactions of C<sub>5</sub>-F, C<sub>5</sub>-Br, and C<sub>5</sub>-SiH<sub>3</sub> with ethylene. There is a modest preference in the interaction energies for the *syn* addition of ethylene to C<sub>5</sub>-F, but it is the differences in the distortion energies, which strongly favor the *anti* cycloaddition that control the  $\pi$ -facial stereoselectivity. In the reaction of C<sub>5</sub>-SiH<sub>3</sub> with ethylene the interaction and distortion energies both favor the *anti* cycloaddition. The preference for *anti* reaction in the distortion energies is larger than in the interaction energies for C<sub>5</sub>-SiH<sub>3</sub>. In the Diels-Alder reaction of C<sub>5</sub>-Br the *syn* preference of the interaction energies is countered by the *anti* preference in the distortion energies and poor stereoselectivity is predicted. The *syn* preference in the interaction energies suggests there are stabilizing dispersive interactions between the substituent and ethylene in the *syn* transition state. The differences in the distortion energies of the *syn* and *anti* reactions appear early on in the course of the intrinsic reaction coordinate. This suggests that the ground state geometries of the dienes are pre-distorted towards either the *syn* or *anti* transition states.

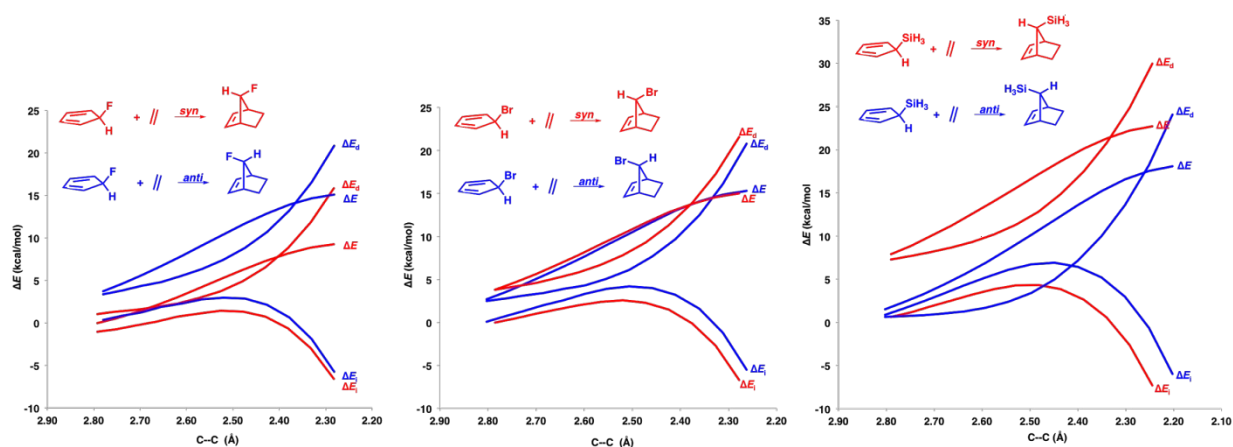

**Figure S1.** Distortion/Interaction analysis performed along the reaction coordinate defined by the average C-C bond forming distances for the *syn* (red) and *anti* (blue) Diels-Alder reactions of C<sub>5</sub>-F (left), C<sub>5</sub>-Br (center), and C<sub>5</sub>-SiH<sub>3</sub> (right) with ethylene. Electronic energies (ΔE), distortion energies (ΔE<sub>d</sub>) and interaction energies (ΔE<sub>i</sub>) are reported in kcal/mol and forming C-C bond length in Å.

**Table S1** M06-2X/6-31G(d) Optimized Cartesian Coordinates

C<sub>5</sub>-Br

|    |             |             |             |
|----|-------------|-------------|-------------|
| C  | -0.32813400 | 0.00000300  | 0.71261100  |
| H  | -0.11863200 | 0.00000700  | 1.78501300  |
| C  | -1.13486700 | 1.18235500  | 0.26383700  |
| H  | -0.81517700 | 2.20516500  | 0.41255000  |
| C  | -2.26145800 | 0.73902500  | -0.31203700 |
| H  | -3.05359500 | 1.35206700  | -0.72548900 |
| C  | -1.13486600 | -1.18235300 | 0.26384700  |
| H  | -0.81517200 | -2.20516100 | 0.41257000  |
| C  | -2.26144900 | -0.73903100 | -0.31204800 |
| H  | -3.05358100 | -1.35207500 | -0.72550500 |
| Br | 1.44516600  | 0.00000000  | -0.13875400 |

C<sub>5</sub>-Cl

|    |             |             |             |
|----|-------------|-------------|-------------|
| C  | 0.26870800  | 0.00000000  | 0.58274800  |
| H  | 0.49877300  | 0.00000000  | 1.65377400  |
| C  | -0.58134900 | 1.18412200  | 0.20853500  |
| H  | -0.24899300 | 2.20750100  | 0.32308100  |
| C  | -1.76308900 | 0.73975800  | -0.23812400 |
| H  | -2.59936400 | 1.35118900  | -0.55605800 |
| C  | -0.58134900 | -1.18412300 | 0.20853500  |
| H  | -0.24899400 | -2.20750100 | 0.32308300  |
| C  | -1.76308900 | -0.73975800 | -0.23812600 |
| H  | -2.59936300 | -1.35118900 | -0.55606000 |
| Cl | 1.86582000  | 0.00000000  | -0.25466000 |

C<sub>5</sub>-H

|   |             |             |             |
|---|-------------|-------------|-------------|
| C | 0.00045200  | -1.21457800 | -0.00018000 |
| H | 0.00070300  | -1.87403700 | 0.87890700  |
| C | 1.17770600  | -0.28016700 | 0.00016800  |
| H | 2.20981600  | -0.60898500 | 0.00025100  |
| C | 0.73518200  | 0.98846000  | -0.00004400 |
| H | 1.34836400  | 1.88243100  | -0.00009900 |
| C | -1.17749200 | -0.28103900 | 0.00019200  |
| H | -2.20935600 | -0.61061500 | 0.00029300  |
| C | -0.73592100 | 0.98790600  | -0.00008200 |
| H | -1.34977500 | 1.88141500  | -0.00015900 |
| H | 0.00068900  | -1.87370800 | -0.87951800 |

C<sub>5</sub>-F

|   |             |            |             |
|---|-------------|------------|-------------|
| C | 0.74397300  | 0.00000100 | 0.36930200  |
| H | 1.02442900  | 0.00000000 | 1.43527200  |
| C | -0.15115500 | 1.18607700 | 0.10462500  |
| H | 0.19110800  | 2.21162000 | 0.15776000  |
| C | -1.39390300 | 0.74183600 | -0.11751800 |

|   |             |             |             |
|---|-------------|-------------|-------------|
| H | -2.27659100 | 1.34988500  | -0.27918600 |
| C | -0.15115500 | -1.18607700 | 0.10462700  |
| H | 0.19111000  | -2.21161900 | 0.15776400  |
| C | -1.39390200 | -0.74183700 | -0.11752100 |
| H | -2.27659100 | -1.34988600 | -0.27919100 |
| F | 1.91371000  | 0.00000000  | -0.36150100 |

C<sub>5</sub>-Me

|   |             |             |             |
|---|-------------|-------------|-------------|
| C | 0.69635500  | 0.00000000  | 0.46696600  |
| H | 0.99056200  | -0.00000100 | 1.52834500  |
| C | -0.20618600 | 1.17448800  | 0.19468800  |
| H | 0.11575000  | 2.20599400  | 0.28368100  |
| C | -1.41954300 | 0.73608300  | -0.17864000 |
| H | -2.27310900 | 1.34979900  | -0.44385500 |
| C | -0.20618600 | -1.17448800 | 0.19468600  |
| H | 0.11575100  | -2.20599400 | 0.28367800  |
| C | -1.41954400 | -0.73608300 | -0.17863800 |
| H | -2.27311100 | -1.34979800 | -0.44385100 |
| C | 1.96722400  | 0.00000000  | -0.39446200 |
| H | 2.57574100  | 0.88592100  | -0.19034900 |
| H | 2.57574000  | -0.88592200 | -0.19035000 |
| H | 1.69995800  | 0.00000100  | -1.45490100 |

C<sub>5</sub>-NH<sub>2</sub>

|   |             |             |             |
|---|-------------|-------------|-------------|
| C | -0.72431000 | -0.00974500 | 0.42038400  |
| H | -0.98743500 | -0.01045000 | 1.49035400  |
| C | 0.19857500  | -1.17656400 | 0.16419400  |
| H | -0.13202300 | -2.20517100 | 0.23919000  |
| C | 1.42152400  | -0.72476700 | -0.14686600 |
| H | 2.29614000  | -1.32726700 | -0.36455500 |
| C | 0.17360500  | 1.18201900  | 0.15090600  |
| H | -0.16334500 | 2.21046500  | 0.22264700  |
| C | 1.40633200  | 0.75373000  | -0.15617100 |
| H | 2.26849700  | 1.37116500  | -0.38329000 |
| N | -1.97564600 | -0.11556800 | -0.33309600 |
| H | -2.55454300 | 0.69968900  | -0.14097100 |
| H | -1.75211700 | -0.07749300 | -1.32638900 |

C<sub>5</sub>-OH

|   |             |             |             |
|---|-------------|-------------|-------------|
| C | 0.74263000  | 0.00000000  | 0.40032100  |
| H | 1.01494300  | -0.00000100 | 1.46611300  |
| C | -0.16561000 | 1.18368700  | 0.13811500  |
| H | 0.17217900  | 2.21065000  | 0.20593400  |
| C | -1.39951600 | 0.74132800  | -0.13674300 |
| H | -2.27570100 | 1.34902600  | -0.33335100 |
| C | -0.16561000 | -1.18368700 | 0.13811400  |

|   |             |             |             |
|---|-------------|-------------|-------------|
| H | 0.17217900  | -2.21065000 | 0.20593300  |
| C | -1.39951700 | -0.74132800 | -0.13674200 |
| H | -2.27570300 | -1.34902500 | -0.33334900 |
| O | 1.97066700  | 0.00000000  | -0.29845400 |
| H | 1.75250200  | 0.00000000  | -1.24203300 |

C<sub>5</sub>-SH

|   |             |             |             |
|---|-------------|-------------|-------------|
| C | 0.26163400  | -0.00000100 | 0.61307700  |
| H | 0.50076200  | -0.00000100 | 1.68438400  |
| C | -0.59492700 | 1.18067900  | 0.24442000  |
| H | -0.26965900 | 2.20554200  | 0.37066500  |
| C | -1.75915200 | 0.73814600  | -0.25411500 |
| H | -2.58011500 | 1.35093700  | -0.60798200 |
| C | -0.59492700 | -1.18067900 | 0.24442000  |
| H | -0.26966000 | -2.20554300 | 0.37066400  |
| C | -1.75915300 | -0.73814600 | -0.25411500 |
| H | -2.58011600 | -1.35093500 | -0.60798100 |
| S | 1.90447800  | 0.00000000  | -0.20725600 |
| H | 1.40629600  | 0.00000100  | -1.45578300 |

C<sub>5</sub>-SiH<sub>3</sub>

|    |             |             |             |
|----|-------------|-------------|-------------|
| C  | 0.20109000  | 0.00001300  | 0.80181400  |
| H  | 0.53285200  | 0.00002800  | 1.84544500  |
| C  | -0.60329800 | 1.17053900  | 0.35821500  |
| H  | -0.32624500 | 2.20170500  | 0.54351600  |
| C  | -1.66938300 | 0.72699900  | -0.34965800 |
| H  | -2.40757300 | 1.34557700  | -0.84653900 |
| C  | -0.60329200 | -1.17053100 | 0.35825100  |
| H  | -0.32623000 | -2.20169000 | 0.54357900  |
| C  | -1.66934500 | -0.72702000 | -0.34968800 |
| H  | -2.40750800 | -1.34561700 | -0.84658400 |
| Si | 1.75167800  | 0.00000100  | -0.31185700 |
| H  | 2.57788100  | 1.20140900  | -0.03006400 |
| H  | 2.57788200  | -1.20139900 | -0.03003100 |
| H  | 1.32082400  | -0.00001800 | -1.72693300 |

Ethylene

|   |             |             |            |
|---|-------------|-------------|------------|
| C | 0.00000000  | 0.66351800  | 0.00000000 |
| H | 0.92385000  | 1.23453000  | 0.00000000 |
| H | -0.92381200 | 1.23456900  | 0.00000000 |
| C | 0.00000000  | -0.66351800 | 0.00000000 |
| H | -0.92385000 | -1.23453000 | 0.00000000 |
| H | 0.92381200  | -1.23456900 | 0.00000000 |

C<sub>5</sub>-Br-Syn-Ethylene

|   |            |             |            |
|---|------------|-------------|------------|
| C | 0.08619800 | -0.82254500 | 0.00004900 |
| C | 0.97801100 | -0.49278500 | 1.16330700 |

|    |             |             |             |
|----|-------------|-------------|-------------|
| H  | 0.64393500  | -0.55367100 | 2.19239900  |
| C  | 2.26606900  | -0.72313800 | 0.70601600  |
| H  | 3.15001100  | -0.77503800 | 1.33105300  |
| C  | 0.97806800  | -0.49273200 | -1.16318800 |
| H  | 0.64389000  | -0.55362200 | -2.19224900 |
| C  | 2.26605000  | -0.72312400 | -0.70608300 |
| H  | 3.14995100  | -0.77500100 | -1.33118200 |
| C  | 0.84102200  | 1.73054600  | 0.68682800  |
| H  | 1.73862900  | 1.98157600  | 1.24020700  |
| H  | -0.09364300 | 1.80806000  | 1.23293400  |
| C  | 0.84112300  | 1.73045400  | -0.68682300 |
| H  | -0.09352100 | 1.80782600  | -1.23297500 |
| H  | 1.73876500  | 1.98141300  | -1.24016500 |
| H  | -0.06145300 | -1.90921200 | 0.00007900  |
| Br | -1.72445100 | -0.12149700 | -0.00002100 |

#### C<sub>5</sub>-Cl-Syn-Ethylene

|    |             |             |             |
|----|-------------|-------------|-------------|
| C  | -0.35928600 | -0.86179500 | -0.00026800 |
| C  | 0.51728900  | -0.48698100 | 1.16342100  |
| H  | 0.18853400  | -0.56564600 | 2.19308800  |
| C  | 1.81495200  | -0.64379000 | 0.70631500  |
| H  | 2.70073400  | -0.64782200 | 1.33078900  |
| C  | 0.51727600  | -0.48565900 | -1.16359700 |
| H  | 0.18832400  | -0.56343500 | -2.19327300 |
| C  | 1.81498000  | -0.64310600 | -0.70669300 |
| H  | 2.70078400  | -0.64632900 | -1.33113700 |
| C  | 0.24533900  | 1.73148300  | 0.68666200  |
| H  | 1.12875200  | 2.02839900  | 1.24013800  |
| H  | -0.69028900 | 1.75477200  | 1.23605600  |
| C  | 0.24563100  | 1.73168300  | -0.68563800 |
| H  | -0.68979000 | 1.75519700  | -1.23539900 |
| H  | 1.12922300  | 2.02902700  | -1.23860400 |
| H  | -0.42842700 | -1.95770500 | -0.00098700 |
| Cl | -2.05911400 | -0.30808600 | -0.00011100 |

#### C<sub>5</sub>-F-Syn-Ethylene

|   |             |             |             |
|---|-------------|-------------|-------------|
| C | 0.16873200  | 1.09537100  | -0.00015900 |
| C | -0.44049200 | 0.36097300  | 1.16365600  |
| H | -0.19309400 | 0.58471300  | 2.19513700  |
| C | -1.64962000 | -0.12800000 | 0.70826800  |
| H | -2.43304900 | -0.54421100 | 1.33088700  |
| C | -0.44033900 | 0.36065000  | -1.16385400 |
| H | -0.19303400 | 0.58403600  | -2.19543400 |
| C | -1.64956900 | -0.12821700 | -0.70822200 |
| H | -2.43296100 | -0.54466900 | -1.33072800 |
| C | 0.95642500  | -1.37959100 | 0.68591200  |

|   |             |             |             |
|---|-------------|-------------|-------------|
| H | 0.37641700  | -2.10590500 | 1.24358000  |
| H | 1.75003300  | -0.87705600 | 1.22862200  |
| C | 0.95645900  | -1.37966900 | -0.68562300 |
| H | 1.75014200  | -0.87722000 | -1.22829800 |
| H | 0.37656900  | -2.10612900 | -1.24322000 |
| H | -0.24188900 | 2.11874900  | -0.00039400 |
| F | 1.53681100  | 1.21762100  | -0.00000300 |

#### C<sub>5</sub>-Me-Syn-Ethylene

|   |             |             |             |
|---|-------------|-------------|-------------|
| C | 0.58466200  | 0.94677800  | -0.00000100 |
| C | -0.27380600 | 0.49059000  | 1.15281400  |
| H | 0.02686100  | 0.60262700  | 2.19026200  |
| C | -1.58897400 | 0.48894800  | 0.70288500  |
| H | -2.46647200 | 0.37928600  | 1.33038500  |
| C | -0.27381200 | 0.49059200  | -1.15281700 |
| H | 0.02687300  | 0.60262300  | -2.19026000 |
| C | -1.58898200 | 0.48893900  | -0.70288000 |
| H | -2.46648000 | 0.37922600  | -1.33037200 |
| C | 0.19949800  | -1.67450000 | 0.68797600  |
| H | -0.65073100 | -2.06115500 | 1.23707700  |
| H | 1.12994900  | -1.63675700 | 1.24653700  |
| C | 0.19945600  | -1.67451600 | -0.68796700 |
| H | 1.12987300  | -1.63677300 | -1.24658600 |
| H | -0.65081900 | -2.06118000 | -1.23699100 |
| H | 0.45103300  | 2.04507500  | 0.00001300  |
| C | 2.08312600  | 0.68870100  | -0.00001300 |
| H | 2.54382100  | 1.14333100  | -0.88310600 |
| H | 2.54384400  | 1.14344200  | 0.88301200  |
| H | 2.33523800  | -0.37293300 | 0.00005000  |

#### C<sub>5</sub>-NH<sub>2</sub>-Syn-Ethylene

|   |             |             |             |
|---|-------------|-------------|-------------|
| C | -0.46783600 | 1.01686300  | -0.01832800 |
| C | 0.33324700  | 0.44568800  | -1.16025000 |
| H | 0.03719300  | 0.58162200  | -2.19486800 |
| C | 1.63075800  | 0.28100700  | -0.70078200 |
| H | 2.49297800  | 0.05768100  | -1.31894400 |
| C | 0.32318300  | 0.46506500  | 1.15419600  |
| H | 0.03604400  | 0.62826800  | 2.18916600  |
| C | 1.62641300  | 0.30047900  | 0.70878900  |
| H | 2.48667000  | 0.09961000  | 1.33787700  |
| C | -0.46092200 | -1.62554400 | -0.67167900 |
| H | 0.32202500  | -2.13462000 | -1.22039300 |
| H | -1.37142100 | -1.43916000 | -1.23480900 |
| C | -0.45431000 | -1.61612900 | 0.70360700  |
| H | -1.36418000 | -1.43636500 | 1.27035300  |
| H | 0.33269100  | -2.11754800 | 1.25398500  |

|   |             |             |             |
|---|-------------|-------------|-------------|
| H | -0.21877500 | 2.09261600  | -0.03156100 |
| N | -1.91049700 | 0.93814600  | -0.11372600 |
| H | -2.22872500 | -0.01365200 | 0.03967600  |
| H | -2.33422600 | 1.50994800  | 0.61228000  |

C<sub>5</sub>-OH-Syn-Ethylene

|   |             |             |             |
|---|-------------|-------------|-------------|
| C | 0.32018200  | 1.08242200  | 0.00014900  |
| C | -0.38027000 | 0.41245600  | 1.16107800  |
| H | -0.11293600 | 0.60469200  | 2.19487700  |
| C | -1.64213800 | 0.06673200  | 0.70585700  |
| H | -2.47008000 | -0.25431200 | 1.32789800  |
| C | -0.38022800 | 0.41283300  | -1.16101800 |
| H | -0.11280200 | 0.60527700  | -2.19475400 |
| C | -1.64211300 | 0.06692600  | -0.70593400 |
| H | -2.47004000 | -0.25389400 | -1.32811000 |
| C | 0.71512000  | -1.52432400 | 0.68751000  |
| H | 0.00879600  | -2.13279700 | 1.23843700  |
| H | 1.59126600  | -1.22101800 | 1.25619200  |
| C | 0.71521100  | -1.52425500 | -0.68772700 |
| H | 1.59141300  | -1.22078700 | -1.25624000 |
| H | 0.00888600  | -2.13255100 | -1.23884500 |
| H | -0.04963000 | 2.12073500  | 0.00034500  |
| O | 1.71189800  | 1.20209600  | 0.00015300  |
| H | 2.08535500  | 0.31113500  | -0.00051500 |

C<sub>5</sub>-SH-Syn-Ethylene

|   |             |             |             |
|---|-------------|-------------|-------------|
| C | -0.38060700 | -0.84396800 | 0.01212900  |
| C | 0.53670200  | -0.48847800 | 1.15633700  |
| H | 0.23062200  | -0.55811300 | 2.19476200  |
| C | 1.82813200  | -0.67856000 | 0.68291700  |
| H | 2.72297900  | -0.69336900 | 1.29475800  |
| C | 0.50087500  | -0.50396000 | -1.16039300 |
| H | 0.15760500  | -0.57684500 | -2.18625400 |
| C | 1.80632300  | -0.67756400 | -0.72571500 |
| H | 2.68152100  | -0.68797000 | -1.36506300 |
| C | 0.33812300  | 1.70569700  | 0.70679800  |
| H | 1.25012100  | 1.97580100  | 1.22650800  |
| H | -0.57763700 | 1.77035500  | 1.28599900  |
| C | 0.28751400  | 1.72211600  | -0.66760500 |
| H | -0.66580100 | 1.80593900  | -1.18286000 |
| H | 1.15697100  | 1.99818700  | -1.25245700 |
| H | -0.45522900 | -1.94157700 | 0.01258000  |
| S | -2.08637200 | -0.20794500 | -0.04787700 |
| H | -2.62157000 | -1.17699100 | 0.71125600  |

C<sub>5</sub>-SiH<sub>3</sub>-Syn-Ethylene



|    |             |             |             |
|----|-------------|-------------|-------------|
| C  | -0.39187800 | -0.81623100 | -0.00002200 |
| C  | 0.53214100  | -0.51073800 | 1.15222000  |
| H  | 0.22181700  | -0.57953000 | 2.19020400  |
| C  | 1.83287800  | -0.72871100 | 0.70046600  |
| H  | 2.71596400  | -0.75103300 | 1.32917100  |
| C  | 0.53215100  | -0.51068600 | -1.15223700 |
| H  | 0.22185500  | -0.57946800 | -2.19022900 |
| C  | 1.83288700  | -0.72868400 | -0.70047100 |
| H  | 2.71598000  | -0.75100400 | -1.32916600 |
| C  | 0.45111700  | 1.68380300  | 0.69015200  |
| H  | 1.35455200  | 1.92213200  | 1.23851900  |
| H  | -0.47286900 | 1.84101600  | 1.23960600  |
| C  | 0.45113500  | 1.68384700  | -0.69010800 |
| H  | -0.47285100 | 1.84104500  | -1.23956800 |
| H  | 1.35458700  | 1.92220100  | -1.23843500 |
| H  | -0.48322000 | -1.92019100 | -0.00004200 |
| Si | -2.18129200 | -0.22074800 | -0.00000500 |
| H  | -2.35259000 | 1.25046500  | -0.00018800 |
| H  | -2.85391800 | -0.77053000 | -1.20439300 |
| H  | -2.85380000 | -0.77022900 | 1.20459100  |

#### C<sub>5</sub>-Br-Anti-Ethylene

|    |             |             |             |
|----|-------------|-------------|-------------|
| C  | 0.05946600  | -0.48902600 | -0.00012600 |
| H  | 0.14352100  | -1.57074300 | -0.00032500 |
| C  | 0.67754600  | 0.24347500  | -1.16109700 |
| H  | 0.46722400  | -0.02125300 | -2.19041000 |
| C  | 1.04375600  | 1.49737000  | -0.70546100 |
| H  | 1.37996300  | 2.31512800  | -1.33167600 |
| C  | 0.67757500  | 0.24307300  | 1.16110900  |
| H  | 0.46716700  | -0.02183700 | 2.19036600  |
| C  | 1.04370300  | 1.49717900  | 0.70575200  |
| H  | 1.38007400  | 2.31471200  | 1.33217200  |
| C  | 2.55952300  | -0.92047700 | -0.68951900 |
| H  | 3.20715800  | -0.25118100 | -1.24252600 |
| H  | 2.20870900  | -1.78850800 | -1.23981900 |
| C  | 2.55950600  | -0.92049200 | 0.68938900  |
| H  | 2.20888700  | -1.78865800 | 1.23960800  |
| H  | 3.20719600  | -0.25127100 | 1.24241700  |
| Br | -1.89703900 | -0.16694300 | -0.00000300 |

#### C<sub>5</sub>-Cl-Anti-Ethylene

|   |             |             |             |
|---|-------------|-------------|-------------|
| C | -0.45873700 | -0.54487700 | 0.00009300  |
| H | -0.28495700 | -1.61688600 | 0.00041600  |
| C | 0.12776000  | 0.22187900  | -1.16247300 |
| H | -0.06426000 | -0.05472300 | -2.19237600 |
| C | 0.42086100  | 1.49237700  | -0.70763700 |

|    |             |             |             |
|----|-------------|-------------|-------------|
| H  | 0.71256700  | 2.32832600  | -1.33232400 |
| C  | 0.12790000  | 0.22250500  | 1.16215600  |
| H  | -0.06413500 | -0.05352300 | 2.19220900  |
| C  | 0.42080000  | 1.49277000  | 0.70676400  |
| H  | 0.71219900  | 2.32916500  | 1.33098700  |
| C  | 2.07479600  | -0.84176200 | -0.68840000 |
| H  | 2.68238400  | -0.13635400 | -1.24199800 |
| H  | 1.76839700  | -1.72577100 | -1.23977700 |
| C  | 2.07522700  | -0.84053700 | 0.68890700  |
| H  | 1.76966900  | -1.72376400 | 1.24203600  |
| H  | 2.68338400  | -0.13422500 | 1.24073100  |
| Cl | -2.27334700 | -0.37802200 | 0.00021400  |

C<sub>5</sub>-F-Anti-Ethylene

|   |             |             |             |
|---|-------------|-------------|-------------|
| C | 0.67684800  | 0.76276000  | 0.00048800  |
| H | 0.24178600  | 1.76285800  | 0.00109800  |
| C | 0.26880600  | -0.12418100 | -1.16565800 |
| H | 0.38440500  | 0.18422100  | -2.19835500 |
| C | 0.28542100  | -1.42235200 | -0.71192900 |
| H | 0.20392200  | -2.30739800 | -1.33270900 |
| C | 0.26851100  | -0.12554000 | 1.16538900  |
| H | 0.38292200  | 0.18158400  | 2.19861500  |
| C | 0.28504100  | -1.42318300 | 0.71029700  |
| H | 0.20326200  | -2.30890900 | 1.33007100  |
| C | -1.87412200 | 0.49620100  | -0.68705000 |
| H | -2.30714600 | -0.32703100 | -1.24209400 |
| H | -1.75837200 | 1.42381700  | -1.23975700 |
| C | -1.87490600 | 0.49434100  | 0.68730800  |
| H | -1.75932500 | 1.42038200  | 1.24270500  |
| H | -2.30777500 | -0.33095700 | 1.23940800  |
| F | 2.05585900  | 0.92812800  | 0.00088200  |

C<sub>5</sub>-Me-Anti-Ethylene

|   |             |             |             |
|---|-------------|-------------|-------------|
| C | -0.74357600 | 0.70133900  | -0.00001600 |
| H | -0.38725400 | 1.73412800  | -0.00000400 |
| C | -0.20620700 | -0.11895500 | 1.15164200  |
| H | -0.35265100 | 0.16394200  | 2.18974200  |
| C | -0.07650400 | -1.42643100 | 0.70421300  |
| H | 0.12311000  | -2.28849700 | 1.33099500  |
| C | -0.20608200 | -0.11898500 | -1.15158200 |
| H | -0.35246400 | 0.16373100  | -2.18974000 |
| C | -0.07644600 | -1.42646800 | -0.70404500 |
| H | 0.12322400  | -2.28860000 | -1.33071900 |
| C | 1.85785400  | 0.62942200  | 0.68939100  |
| H | 2.37780600  | -0.14529900 | 1.24038400  |
| H | 1.67830100  | 1.54851100  | 1.23891000  |

|   |             |             |             |
|---|-------------|-------------|-------------|
| C | 1.85796700  | 0.62905100  | -0.68943600 |
| H | 1.67859400  | 1.54789300  | -1.23942200 |
| H | 2.37802100  | -0.14599700 | -1.23987200 |
| C | -2.28404100 | 0.71887400  | -0.00012700 |
| H | -2.66185000 | 1.24093000  | 0.88443100  |
| H | -2.66167400 | 1.24143700  | -0.88447000 |
| H | -2.68095200 | -0.29926000 | -0.00047300 |

C<sub>5</sub>-NH<sub>2</sub>-Anti-Ethylene

|   |             |             |             |
|---|-------------|-------------|-------------|
| C | -0.73334100 | -0.72575500 | -0.04191600 |
| H | -0.33098200 | -1.73953800 | -0.08374300 |
| C | -0.22192100 | 0.17482400  | -1.15247100 |
| H | -0.35865700 | -0.07443400 | -2.19911700 |
| C | -0.14521800 | 1.45721800  | -0.64389100 |
| H | 0.02260500  | 2.35600700  | -1.22697200 |
| C | -0.23669000 | 0.07260900  | 1.16030900  |
| H | -0.37239800 | -0.26539700 | 2.18361800  |
| C | -0.15412700 | 1.39578600  | 0.77202400  |
| H | -0.00226000 | 2.24114400  | 1.43404900  |
| C | 1.87033400  | -0.54920600 | -0.70407600 |
| H | 2.36464900  | 0.27038500  | -1.21182000 |
| H | 1.70877400  | -1.43987400 | -1.30363100 |
| C | 1.86077200  | -0.61899800 | 0.67021400  |
| H | 1.69090100  | -1.56632800 | 1.17299700  |
| H | 2.34758000  | 0.14366200  | 1.26614200  |
| N | -2.19595200 | -0.84440000 | -0.13988000 |
| H | -2.54064000 | -1.34527300 | 0.67740400  |
| H | -2.59676200 | 0.09157500  | -0.09091700 |

C<sub>5</sub>-OH-Anti-Ethylene

|   |             |             |             |
|---|-------------|-------------|-------------|
| C | 0.69962800  | 0.76412400  | 0.00070300  |
| H | 0.26883000  | 1.76476000  | 0.00173700  |
| C | 0.24948400  | -0.11426500 | -1.16297900 |
| H | 0.36814600  | 0.19100900  | -2.19698200 |
| C | 0.24432300  | -1.41661000 | -0.71282400 |
| H | 0.14183200  | -2.29982500 | -1.33361600 |
| C | 0.25004800  | -0.11628400 | 1.16307800  |
| H | 0.36829000  | 0.18736000  | 2.19761500  |
| C | 0.24450900  | -1.41785200 | 0.71059900  |
| H | 0.14196400  | -2.30213800 | 1.32986500  |
| C | -1.88240100 | 0.51345200  | -0.68668400 |
| H | -2.33074900 | -0.30200000 | -1.24143000 |
| H | -1.75025200 | 1.43899500  | -1.23886200 |
| C | -1.88282300 | 0.51194200  | 0.68742500  |
| H | -1.75110700 | 1.43615600  | 1.24192500  |
| H | -2.33088600 | -0.30511700 | 1.24004400  |

|   |            |            |            |
|---|------------|------------|------------|
| O | 2.10341800 | 0.96937500 | 0.00039500 |
| H | 2.50997600 | 0.08875500 | 0.00064000 |

C<sub>5</sub>-SH-Anti-Ethylene

|   |             |             |             |
|---|-------------|-------------|-------------|
| C | -0.47402900 | -0.54339400 | -0.00041300 |
| H | -0.29280300 | -1.61777900 | -0.00119700 |
| C | 0.14443600  | 0.20436100  | -1.15786600 |
| H | -0.04931100 | -0.06556700 | -2.18980600 |
| C | 0.45106500  | 1.47761500  | -0.70485000 |
| H | 0.75977100  | 2.30739600  | -1.33006300 |
| C | 0.14465500  | 0.20266100  | 1.15804900  |
| H | -0.04895300 | -0.06875900 | 2.18963100  |
| C | 0.45119000  | 1.47659300  | 0.70687000  |
| H | 0.76012300  | 2.30540400  | 1.33325200  |
| C | 2.08625800  | -0.83455000 | -0.68995300 |
| H | 2.70367100  | -0.13489400 | -1.24029000 |
| C | 2.08551500  | -0.83660800 | 0.68891000  |
| H | 1.78129900  | -1.72270300 | 1.23806600  |
| H | 2.70280500  | -0.13916100 | 1.24217200  |
| H | -2.36922300 | 0.90976600  | 0.00104200  |
| S | -2.31657100 | -0.43342000 | -0.00031200 |
| H | 1.78320200  | -1.71905300 | -1.24228600 |

C<sub>5</sub>-SiH<sub>3</sub>-Anti-Ethylene

|    |             |             |             |
|----|-------------|-------------|-------------|
| C  | -0.43191500 | -0.61416100 | 0.00025100  |
| H  | -0.26325700 | -1.69401200 | 0.00068000  |
| C  | 0.17903900  | 0.13058500  | -1.14643400 |
| H  | 0.00562300  | -0.13586600 | -2.18457100 |
| C  | 0.42931900  | 1.43626300  | -0.69782200 |
| H  | 0.71129100  | 2.27006100  | -1.33022200 |
| C  | 0.17901400  | 0.13151400  | 1.14633500  |
| H  | 0.00564200  | -0.13411100 | 2.18469100  |
| C  | 0.42933900  | 1.43681800  | 0.69668000  |
| H  | 0.71134800  | 2.27111100  | 1.32841100  |
| C  | 2.14388000  | -0.75422300 | -0.69221600 |
| H  | 2.73810600  | -0.03238300 | -1.24035300 |
| H  | 1.91461000  | -1.66618600 | -1.23529100 |
| C  | 2.14412900  | -0.75323200 | 0.69277000  |
| H  | 1.91524500  | -1.66441800 | 1.23730300  |
| H  | 2.73834300  | -0.03038000 | 1.23958600  |
| Si | -2.31719300 | -0.31946500 | 0.00014600  |
| H  | -2.91798100 | -0.95840200 | -1.19894900 |
| H  | -2.91814800 | -0.95865200 | 1.19904000  |
| H  | -2.63695500 | 1.12435600  | 0.00024700  |

C<sub>5</sub>-H Ethylene

|   |             |             |             |
|---|-------------|-------------|-------------|
| C | -0.36904600 | 0.00109400  | -1.32274000 |
| H | 0.49489400  | 0.00229000  | -1.98854500 |
| C | -0.46357500 | 1.15429200  | -0.35970200 |
| H | -0.39767900 | 2.19226100  | -0.66797700 |
| C | -1.17834700 | 0.70194400  | 0.74319800  |
| H | -1.55653600 | 1.32763400  | 1.54392500  |
| C | -0.46176700 | -1.15376400 | -0.36148200 |
| H | -0.39494300 | -2.19112100 | -0.67163600 |
| C | -1.17739300 | -0.70441400 | 0.74202800  |
| H | -1.55500400 | -1.33195800 | 1.54157300  |
| C | 1.61665200  | 0.68971100  | 0.33376300  |
| H | 1.54402100  | 1.24035100  | 1.26418600  |
| H | 2.05005200  | 1.23911900  | -0.49663500 |
| C | 1.61711500  | -0.68914600 | 0.33303400  |
| H | 2.05094300  | -1.23700700 | -0.49816600 |
| H | 1.54526700  | -1.24071800 | 1.26296200  |
| H | -1.28285100 | 0.00084100  | -1.93828700 |

#### C<sub>5</sub>-Br-Syn-Ethylene-Adduct

|    |             |             |             |
|----|-------------|-------------|-------------|
| C  | 0.07599800  | -0.74250500 | -0.00010400 |
| C  | 0.94657000  | -0.16878700 | 1.13016100  |
| H  | 0.63816700  | -0.40421800 | 2.14909900  |
| C  | 2.27845900  | -0.73248900 | 0.66910000  |
| H  | 3.09693000  | -1.00061100 | 1.32796600  |
| C  | 0.94654900  | -0.16846900 | -1.13022400 |
| H  | 0.63812500  | -0.40361200 | -2.14922200 |
| C  | 2.27844700  | -0.73230100 | -0.66934600 |
| H  | 3.09690500  | -1.00023800 | -1.32830300 |
| C  | 0.96302400  | 1.34824700  | 0.77651200  |
| H  | 1.83961300  | 1.83941200  | 1.20416400  |
| H  | 0.06725200  | 1.83668200  | 1.16805100  |
| C  | 0.96301400  | 1.34846900  | -0.77614400 |
| H  | 0.06724100  | 1.83702300  | -1.16753300 |
| H  | 1.83960000  | 1.83975200  | -1.20366800 |
| H  | 0.01884800  | -1.82936600 | -0.00025700 |
| Br | -1.77185800 | -0.10365200 | -0.00000100 |

#### C<sub>5</sub>-Cl-Syn-Ethylene-Adduct

|   |             |             |             |
|---|-------------|-------------|-------------|
| C | -0.86387500 | 0.10397000  | 0.00000000  |
| C | 0.00434900  | -0.47902200 | 1.12985400  |
| H | -0.33273300 | -0.28676800 | 2.14888000  |
| C | 0.00434900  | -1.92401200 | 0.66915200  |
| H | 0.07544100  | -2.78219200 | 1.32814100  |
| C | 0.00434900  | -0.47902200 | -1.12985400 |
| H | -0.33273300 | -0.28676800 | -2.14888000 |
| C | 0.00434900  | -1.92401200 | -0.66915200 |

|    |             |             |             |
|----|-------------|-------------|-------------|
| H  | 0.07544100  | -2.78219200 | -1.32814100 |
| C  | 1.40804500  | 0.09776400  | 0.77639600  |
| H  | 2.20134000  | -0.52098100 | 1.20160600  |
| H  | 1.51565100  | 1.11115400  | 1.17096500  |
| C  | 1.40804500  | 0.09776400  | -0.77639600 |
| H  | 1.51565100  | 1.11115400  | -1.17096500 |
| H  | 2.20134000  | -0.52098100 | -1.20160600 |
| H  | -1.88345200 | -0.27952200 | 0.00000000  |
| Cl | -0.99138800 | 1.89861900  | 0.00000000  |

C<sub>5</sub>-F-Syn-Ethylene-Adduct

|   |             |             |             |
|---|-------------|-------------|-------------|
| C | 1.00088900  | 0.42632000  | 0.00000000  |
| C | 0.15387300  | -0.18013800 | -1.13008200 |
| H | 0.49028700  | 0.01084900  | -2.15012800 |
| C | 0.15387300  | -1.62036000 | -0.66942300 |
| H | 0.08940200  | -2.48164600 | -1.32507400 |
| C | 0.15387300  | -0.18013800 | 1.13008200  |
| H | 0.49028700  | 0.01084900  | 2.15012800  |
| C | 0.15387300  | -1.62036000 | 0.66942300  |
| H | 0.08940200  | -2.48164600 | 1.32507400  |
| C | -1.23862400 | 0.42430100  | -0.77665900 |
| H | -2.04970000 | -0.16835200 | -1.20508300 |
| H | -1.31096900 | 1.44309600  | -1.16532200 |
| C | -1.23862400 | 0.42430100  | 0.77665900  |
| H | -1.31096900 | 1.44309600  | 1.16532200  |
| H | -2.04970000 | -0.16835200 | 1.20508300  |
| F | 0.96467800  | 1.80523900  | 0.00000000  |
| H | 2.04505400  | 0.10140900  | 0.00000000  |

C<sub>5</sub>-Me-Syn-Ethylene-Adduct

|   |             |             |             |
|---|-------------|-------------|-------------|
| C | -0.70530200 | -0.81880300 | -0.00010000 |
| C | 0.15784200  | -0.19390500 | 1.12299800  |
| H | -0.11657800 | -0.44217700 | 2.15083000  |
| C | 1.53896800  | -0.62554600 | 0.66849800  |
| H | 2.38615600  | -0.78677400 | 1.32678400  |
| C | 0.15779800  | -0.19359400 | -1.12305900 |
| H | -0.11666100 | -0.44158200 | -2.15094900 |
| C | 1.53894200  | -0.62536100 | -0.66873200 |
| H | 2.38610400  | -0.78640400 | -1.32709600 |
| C | 0.05924100  | 1.32526400  | 0.77688100  |
| H | 0.89757300  | 1.88410500  | 1.19956800  |
| H | -0.86237800 | 1.75804100  | 1.17839000  |
| C | 0.05921100  | 1.32548200  | -0.77651300 |
| H | -0.86242400 | 1.75836800  | -1.17786800 |
| H | 0.89752700  | 1.88444100  | -1.19907600 |
| H | -0.57989000 | -1.90720700 | -0.00025400 |

|   |             |             |             |
|---|-------------|-------------|-------------|
| C | -2.18918800 | -0.47928600 | -0.00002500 |
| H | -2.67812600 | -0.90186400 | -0.88423400 |
| H | -2.67810500 | -0.90215400 | 0.88405700  |
| H | -2.37826200 | 0.59770400  | 0.00015400  |

C<sub>5</sub>-NH<sub>2</sub>-Syn-Ethylene-Adduct

|   |             |             |             |
|---|-------------|-------------|-------------|
| C | 0.68070600  | -0.84842100 | -0.05447600 |
| C | -0.16203900 | -0.13091900 | -1.13384700 |
| H | 0.10631300  | -0.34499200 | -2.16936000 |
| C | -1.55083500 | -0.52833100 | -0.68594300 |
| H | -2.40499500 | -0.64494100 | -1.34437900 |
| C | -0.14989700 | -0.24280600 | 1.11787900  |
| H | 0.12252600  | -0.55658200 | 2.12847500  |
| C | -1.54370300 | -0.59649900 | 0.65095100  |
| H | -2.38986400 | -0.78705900 | 1.30269800  |
| C | 0.02604400  | 1.35882100  | -0.71008400 |
| H | -0.77902200 | 1.98864600  | -1.09515200 |
| H | 0.96899000  | 1.75430800  | -1.10278600 |
| C | 0.03439800  | 1.28024500  | 0.84321700  |
| H | 0.98303000  | 1.63765200  | 1.25951900  |
| H | -0.76308600 | 1.86903500  | 1.30173100  |
| H | 0.53552000  | -1.93135100 | -0.11152600 |
| N | 2.10227600  | -0.57715300 | -0.13592300 |
| H | 2.29911300  | 0.40566300  | 0.03599500  |
| H | 2.59749800  | -1.10284700 | 0.58006600  |

C<sub>5</sub>-OH-Syn-Ethylene-Adduct

|   |             |             |             |
|---|-------------|-------------|-------------|
| C | 0.63924000  | -0.89142900 | 0.00002600  |
| C | -0.15220900 | -0.18369300 | -1.12998700 |
| H | 0.10487800  | -0.46480600 | -2.15243600 |
| C | -1.55930600 | -0.48643600 | -0.66954500 |
| H | -2.41484300 | -0.60710500 | -1.32528200 |
| C | -0.15209000 | -0.18354300 | 1.13002800  |
| H | 0.10510300  | -0.46452100 | 2.15248800  |
| C | -1.55923500 | -0.48634600 | 0.66977500  |
| H | -2.41470200 | -0.60692500 | 1.32561900  |
| C | 0.12449700  | 1.30931200  | -0.77820400 |
| H | -0.63638700 | 1.96899300  | -1.19997500 |
| H | 1.09021500  | 1.63140100  | -1.18584500 |
| C | 0.12457900  | 1.30941600  | 0.77801700  |
| H | 1.09034000  | 1.63156000  | 1.18551300  |
| H | -0.63626100 | 1.96915200  | 1.19977900  |
| H | 0.47126700  | -1.97071000 | 0.00010600  |
| O | 2.02869800  | -0.70661800 | -0.00006100 |
| H | 2.21794500  | 0.24221300  | -0.00014200 |

C<sub>5</sub>-SH-Syn-Ethylene-Adduct

|   |             |             |             |
|---|-------------|-------------|-------------|
| C | -0.42845600 | -0.74824000 | -0.08668900 |
| C | 0.46504400  | -0.31647000 | 1.09965900  |
| H | 0.17150100  | -0.67540200 | 2.08796200  |
| C | 1.80414200  | -0.79665600 | 0.57146200  |
| H | 2.63610800  | -1.11519500 | 1.19009300  |
| C | 0.45219500  | -0.03694900 | -1.13628200 |
| H | 0.14808700  | -0.14322100 | -2.17877800 |
| C | 1.79633100  | -0.63023500 | -0.75546500 |
| H | 2.62017200  | -0.78020800 | -1.44458800 |
| C | 0.46917800  | 1.23387000  | 0.94199400  |
| H | 1.34526300  | 1.67516400  | 1.42260600  |
| H | -0.42756500 | 1.66611600  | 1.39292100  |
| C | 0.46344400  | 1.42788600  | -0.59854600 |
| H | -0.42871300 | 1.97047000  | -0.92492100 |
| H | 1.33880400  | 1.97086300  | -0.96240600 |
| H | -0.41933400 | -1.83009300 | -0.23172800 |
| S | -2.15829900 | -0.15995000 | -0.09087400 |
| H | -2.58280800 | -0.97853400 | 0.88603200  |

C<sub>5</sub>-SiH<sub>3</sub>-Syn-Ethylene-Adduct

|    |             |             |             |
|----|-------------|-------------|-------------|
| C  | -0.42527400 | -0.72688900 | -0.00000400 |
| C  | 0.49777300  | -0.18987800 | 1.12407400  |
| H  | 0.20599800  | -0.40961200 | 2.15296200  |
| C  | 1.83644800  | -0.74964600 | 0.66790000  |
| H  | 2.66842200  | -0.97359900 | 1.32692200  |
| C  | 0.49777400  | -0.18986800 | -1.12407400 |
| H  | 0.20600600  | -0.40959500 | -2.15296500 |
| C  | 1.83644700  | -0.74964100 | -0.66790500 |
| H  | 2.66842200  | -0.97358700 | -1.32692700 |
| C  | 0.54929900  | 1.33178300  | 0.77664400  |
| H  | 1.43740000  | 1.80683100  | 1.19988800  |
| H  | -0.32722800 | 1.85320000  | 1.17451500  |
| C  | 0.54930000  | 1.33178800  | -0.77663400 |
| H  | -0.32722800 | 1.85320800  | -1.17450100 |
| H  | 1.43739900  | 1.80684400  | -1.19987600 |
| H  | -0.40970500 | -1.82423900 | -0.00000800 |
| Si | -2.23965500 | -0.20258700 | -0.00000100 |
| H  | -2.43211300 | 1.26950300  | 0.00004000  |
| H  | -2.91139000 | -0.75428300 | -1.20463500 |
| H  | -2.91140900 | -0.75434300 | 1.20459400  |

C<sub>5</sub>-Br-Anti-Ethylene-Adduct

|   |             |             |            |
|---|-------------|-------------|------------|
| C | 0.55217600  | -0.31566100 | 0.00000000 |
| H | 1.53594500  | -0.78832200 | 0.00000000 |
| C | -0.36530700 | -0.80384200 | 1.12936200 |



|    |             |             |             |
|----|-------------|-------------|-------------|
| H  | -0.05856100 | -0.56072400 | 2.14672100  |
| C  | -1.71068800 | -0.27395600 | 0.66741200  |
| H  | -2.53926600 | -0.04593400 | 1.32773800  |
| C  | -0.36530700 | -0.80384200 | -1.12936200 |
| H  | -0.05856100 | -0.56072400 | -2.14672100 |
| C  | -1.71068800 | -0.27395600 | -0.66741200 |
| H  | -2.53926600 | -0.04593400 | -1.32773800 |
| C  | -0.36530700 | -2.32666000 | 0.77941500  |
| H  | -1.23554700 | -2.83102000 | 1.20433000  |
| H  | 0.53238200  | -2.81176500 | 1.17425000  |
| C  | -0.36530700 | -2.32666000 | -0.77941500 |
| H  | 0.53238200  | -2.81176500 | -1.17425000 |
| H  | -1.23554700 | -2.83102000 | -1.20433000 |
| Br | 0.88710300  | 1.60099000  | 0.00000000  |

#### C<sub>5</sub>-Cl-Anti-Ethylene-Adduct

|    |             |             |             |
|----|-------------|-------------|-------------|
| C  | -0.79158800 | 0.14858100  | 0.00000000  |
| H  | -1.77011400 | -0.33739800 | 0.00000000  |
| C  | 0.12736400  | -0.34420200 | -1.12921100 |
| H  | -0.17991200 | -0.10255600 | -2.14690800 |
| C  | 1.47129700  | 0.18944800  | -0.66742700 |
| H  | 2.29892100  | 0.42187700  | -1.32744900 |
| C  | 0.12736400  | -0.34420200 | 1.12921100  |
| H  | -0.17991200 | -0.10255600 | 2.14690800  |
| C  | 1.47129700  | 0.18944800  | 0.66742700  |
| H  | 2.29892100  | 0.42187700  | 1.32744900  |
| C  | 0.12736400  | -1.86554700 | -0.77932200 |
| H  | 0.99828500  | -2.36909000 | -1.20369600 |
| H  | -0.76952400 | -2.35206700 | -1.17433600 |
| C  | 0.12736400  | -1.86554700 | 0.77932200  |
| H  | -0.76952400 | -2.35206700 | 1.17433600  |
| H  | 0.99828500  | -2.36909000 | 1.20369600  |
| Cl | -1.11107000 | 1.91136400  | 0.00000000  |

#### C<sub>5</sub>-F-Anti-Ethylene-Adduct

#### C<sub>5</sub>-Me-Anti-Ethylene-Adduct

|   |             |             |            |
|---|-------------|-------------|------------|
| C | 0.94664400  | 0.46012100  | 0.00000000 |
| H | 1.90086000  | -0.08465100 | 0.00000000 |
| C | 0.02594900  | -0.07471600 | 1.12311700 |
| H | 0.31571700  | 0.15835400  | 2.15027700 |
| C | -1.32570600 | 0.44665500  | 0.66815200 |

|   |             |             |             |
|---|-------------|-------------|-------------|
| H | -2.16152800 | 0.65996300  | 1.32595500  |
| C | 0.02594900  | -0.07471600 | -1.12311700 |
| H | 0.31571700  | 0.15835400  | -2.15027700 |
| C | -1.32570600 | 0.44665500  | -0.66815200 |
| H | -2.16152800 | 0.65996300  | -1.32595500 |
| C | 0.02594900  | -1.59609200 | 0.77788200  |
| H | -0.84076000 | -2.10885700 | 1.20197000  |
| H | 0.92691200  | -2.07606400 | 1.17290600  |
| C | 0.02594900  | -1.59609200 | -0.77788200 |
| H | 0.92691200  | -2.07606400 | -1.17290600 |
| H | -0.84076000 | -2.10885700 | -1.20197000 |
| C | 1.22191600  | 1.95552800  | 0.00000000  |
| H | 1.80066200  | 2.24254100  | 0.88406900  |
| H | 1.80066200  | 2.24254100  | -0.88406900 |
| H | 0.29146000  | 2.52873200  | 0.00000000  |

#### C<sub>5</sub>-NH<sub>2</sub>-Anti-Ethylene-Adduct

|   |             |             |             |
|---|-------------|-------------|-------------|
| C | -0.75241100 | -0.75425000 | -0.05053800 |
| H | -0.56199300 | -1.83339000 | -0.11120600 |
| C | 0.04886000  | 0.01061400  | -1.12564700 |
| H | -0.27534100 | -0.13841500 | -2.15654800 |
| C | -0.03070300 | 1.42754700  | -0.58428000 |
| H | 0.02199700  | 2.32620300  | -1.18963700 |
| C | 0.04742800  | -0.11792800 | 1.12378900  |
| H | -0.27001800 | -0.38269200 | 2.13528800  |
| C | -0.02910600 | 1.35059600  | 0.75152800  |
| H | 0.02177900  | 2.17496700  | 1.45497700  |
| C | 1.48986100  | -0.48581200 | -0.80442500 |
| H | 2.24884100  | 0.20393500  | -1.18069700 |
| H | 1.66709800  | -1.46377200 | -1.26242200 |
| C | 1.48544200  | -0.58442000 | 0.74992900  |
| H | 1.64922400  | -1.61547500 | 1.07935300  |
| H | 2.25071300  | 0.04055900  | 1.21623400  |
| N | -2.18405800 | -0.54839000 | -0.13524600 |
| H | -2.64282200 | -0.99985100 | 0.65293900  |
| H | -2.37730100 | 0.44857700  | -0.05369200 |

#### C<sub>5</sub>-OH-Anti-Ethylene-Adduct

|   |             |             |             |
|---|-------------|-------------|-------------|
| C | 0.96249700  | 0.48265600  | 0.00000000  |
| H | 1.94798700  | 0.00432900  | 0.00000000  |
| C | 0.04944800  | -0.05452800 | 1.12947300  |
| H | 0.35066400  | 0.18579100  | 2.15014800  |
| C | -1.29173800 | 0.48918600  | 0.66998500  |
| H | -2.12512800 | 0.72431700  | 1.32344800  |
| C | 0.04944800  | -0.05452800 | -1.12947300 |
| H | 0.35066400  | 0.18579100  | -2.15014800 |

|   |             |             |             |
|---|-------------|-------------|-------------|
| C | -1.29173800 | 0.48918600  | -0.66998500 |
| H | -2.12512800 | 0.72431700  | -1.32344800 |
| C | 0.04944800  | -1.57026900 | 0.77870400  |
| H | -0.81650600 | -2.08423400 | 1.20172400  |
| H | 0.95007300  | -2.05102800 | 1.17296700  |
| C | 0.04944800  | -1.57026900 | -0.77870400 |
| H | 0.95007300  | -2.05102800 | -1.17296700 |
| H | -0.81650600 | -2.08423400 | -1.20172400 |
| O | 1.19417100  | 1.86179100  | 0.00000000  |
| H | 0.31955700  | 2.28304200  | 0.00000000  |

C<sub>5</sub>-SH-Anti-Ethylene-Adduct

|   |             |             |             |
|---|-------------|-------------|-------------|
| C | -0.78513900 | 0.15983800  | 0.00000000  |
| H | -1.75401000 | -0.35161000 | 0.00000000  |
| C | 0.13310600  | -0.35829400 | -1.12862100 |
| H | -0.16684100 | -0.11738500 | -2.14898600 |
| C | 1.48168200  | 0.16657800  | -0.66859800 |
| H | 2.31617200  | 0.38409500  | -1.32612800 |
| C | 0.13310600  | -0.35829400 | 1.12862100  |
| H | -0.16684100 | -0.11738500 | 2.14898600  |
| C | 1.48168200  | 0.16657800  | 0.66859800  |
| H | 2.31617200  | 0.38409500  | 1.32612800  |
| C | 0.13310600  | -1.87884400 | -0.77865100 |
| H | 1.00021600  | -2.38995700 | -1.20295000 |
| C | 0.13310600  | -1.87884400 | 0.77865100  |
| H | -0.76733600 | -2.35904400 | 1.17379000  |
| H | 1.00021600  | -2.38995700 | 1.20295000  |
| H | 0.05989400  | 2.37205700  | 0.00000000  |
| S | -1.20838700 | 1.92698900  | 0.00000000  |
| H | -0.76733600 | -2.35904400 | -1.17379000 |

C<sub>5</sub>-SiH<sub>3</sub>-Anti-Ethylene-Adduct

|   |             |             |             |
|---|-------------|-------------|-------------|
| C | 0.45775300  | -0.64202300 | 0.00000000  |
| H | 0.38586900  | -1.73985100 | -0.00000100 |
| C | -0.42280200 | -0.03943900 | 1.12423500  |
| H | -0.09637600 | -0.20052500 | 2.15361100  |
| C | -0.53018900 | 1.40552700  | 0.66792500  |
| H | -0.70232200 | 2.24983300  | 1.32645000  |
| C | -0.42280300 | -0.03943800 | -1.12423500 |
| H | -0.09637600 | -0.20052400 | -2.15361100 |
| C | -0.53018900 | 1.40552700  | -0.66792400 |
| H | -0.70232200 | 2.24983300  | -1.32644800 |
| C | -1.80186500 | -0.68808700 | 0.77695700  |
| H | -2.63372300 | -0.12060200 | 1.20142500  |
| H | -1.85162200 | -1.70664500 | 1.17375000  |
| C | -1.80186600 | -0.68808700 | -0.77695700 |

|    |             |             |             |
|----|-------------|-------------|-------------|
| H  | -1.85162200 | -1.70664400 | -1.17375100 |
| H  | -2.63372300 | -0.12060100 | -1.20142400 |
| Si | 2.29090000  | -0.19220800 | 0.00000000  |
| H  | 2.93793200  | -0.78206300 | 1.20136100  |
| H  | 2.93792100  | -0.78201300 | -1.20139100 |
| H  | 2.54552300  | 1.26683200  | 0.00003000  |

#### C<sub>5</sub>-H-Ethylene-Adduct

|   |             |             |             |
|---|-------------|-------------|-------------|
| C | -1.12749700 | 0.78977100  | 0.00000000  |
| H | -2.12870300 | 0.34359800  | 0.00000000  |
| C | -0.22227600 | 0.25035700  | -1.12452000 |
| H | -0.51066400 | 0.47793300  | -2.15212700 |
| C | 1.12433700  | 0.78370800  | -0.66816800 |
| H | 1.95970800  | 0.99963900  | -1.32570000 |
| C | -0.22227600 | 0.25035700  | 1.12452000  |
| H | -0.51066400 | 0.47793300  | 2.15212700  |
| C | 1.12433700  | 0.78370800  | 0.66816800  |
| H | 1.95970800  | 0.99963900  | 1.32570000  |
| C | -0.22227600 | -1.27146700 | -0.77687700 |
| H | 0.64338100  | -1.78459400 | -1.20256700 |
| H | -1.12428100 | -1.74982200 | -1.17169600 |
| C | -0.22227600 | -1.27146700 | 0.77687700  |
| H | -1.12428100 | -1.74982200 | 1.17169600  |
| H | 0.64338100  | -1.78459400 | 1.20256700  |
| H | -1.20001700 | 1.88029600  | 0.00000000  |

#### Br-Cyclopentane

|    |             |             |             |
|----|-------------|-------------|-------------|
| C  | -0.78993052 | 0.86805554  | 0.00000000  |
| H  | -1.15109352 | 1.92623154  | 0.00000000  |
| C  | -1.33699252 | 0.10241654  | -1.17992100 |
| H  | -1.94728764 | 0.75052022  | -1.77355513 |
| C  | -2.08446052 | -0.94253346 | -0.73586700 |
| H  | -1.66593160 | -1.85988456 | -1.09391796 |
| C  | -1.33707152 | 0.10243954  | 1.17988900  |
| H  | -1.94737372 | 0.75057583  | 1.77348025  |
| C  | -2.08454052 | -0.94252146 | 0.73590900  |
| H  | -1.66605722 | -1.85986167 | 1.09404120  |
| Br | 1.12006948  | 0.86805554  | 0.00000000  |
| H  | -0.52619496 | -0.26580005 | 1.77299845  |
| H  | -3.08791022 | -0.84276243 | 1.09395562  |
| H  | -0.52608610 | -0.26584096 | -1.77297849 |
| H  | -3.08780412 | -0.84283474 | -1.09400354 |

#### Cl-Cyclopentane

|    |             |             |             |
|----|-------------|-------------|-------------|
| C  | -0.78993052 | 0.86805554  | 0.00000000  |
| H  | -1.15109352 | 1.92623154  | 0.00000000  |
| C  | -1.33699252 | 0.10241654  | -1.17992100 |
| H  | -1.94728764 | 0.75052022  | -1.77355513 |
| C  | -2.08446052 | -0.94253346 | -0.73586700 |
| H  | -1.66593160 | -1.85988456 | -1.09391796 |
| C  | -1.33707152 | 0.10243954  | 1.17988900  |
| H  | -1.94737372 | 0.75057583  | 1.77348025  |
| C  | -2.08454052 | -0.94252146 | 0.73590900  |
| H  | -1.66605722 | -1.85986167 | 1.09404120  |
| Cl | 0.97006948  | 0.86805554  | 0.00000000  |
| H  | -0.52619496 | -0.26580005 | 1.77299845  |
| H  | -3.08791022 | -0.84276243 | 1.09395562  |
| H  | -3.08780412 | -0.84283474 | -1.09400354 |
| H  | -0.52608610 | -0.26584096 | -1.77297849 |

Br-Cyclopentane

|    |             |             |             |
|----|-------------|-------------|-------------|
| C  | 0.00000000  | 0.00000000  | 0.00000000  |
| H  | 0.00000000  | 0.00000000  | 1.08920446  |
| C  | 1.38068604  | 0.00000000  | -0.64471874 |
| H  | 1.96798020  | 0.78940141  | -0.15731516 |
| C  | 1.10774678  | 0.36246317  | -2.11737614 |
| H  | 1.01253730  | -0.55021281 | -2.71122535 |
| C  | -0.68712645 | 1.19757340  | -0.64470487 |
| H  | -0.29487862 | 2.09981649  | -0.15713222 |
| C  | -0.23670129 | 1.14147708  | -2.11733546 |
| H  | -0.98108603 | 0.60527411  | -2.71153723 |
| Br | -0.95475025 | -1.64853703 | -0.51382569 |
| H  | -1.77130291 | 1.19031287  | -0.51583519 |
| H  | -0.13976977 | 2.14308484  | -2.54296689 |
| H  | 1.91404929  | -0.94391660 | -0.51569984 |
| H  | 1.92843380  | 0.94448087  | -2.54340457 |

Cl-Cyclopentane

|    |             |             |             |
|----|-------------|-------------|-------------|
| C  | 0.00000000  | 0.00000000  | 0.00000000  |
| H  | 0.00000000  | 0.00000000  | 1.09040961  |
| C  | 1.38954341  | 0.00000000  | -0.62766698 |
| H  | 1.97997422  | 0.76645028  | -0.10985952 |
| C  | 1.14569936  | 0.40609289  | -2.09457131 |
| H  | 1.05408880  | -0.48607000 | -2.71892775 |
| C  | -0.66289452 | 1.22124809  | -0.62764631 |
| H  | -0.27117803 | 2.10578450  | -0.10964461 |
| C  | -0.18942697 | 1.20096348  | -2.09450882 |
| H  | -0.92997675 | 0.69552298  | -2.71923349 |
| Cl | -0.89489452 | -1.50395805 | -0.48522353 |
| H  | -1.74915350 | 1.22066865  | -0.51552880 |

|   |             |             |             |
|---|-------------|-------------|-------------|
| H | -0.07054610 | 2.21359687  | -2.48737643 |
| H | 1.97916108  | 0.99306527  | -2.48790547 |
| H | 1.90737274  | -0.95486828 | -0.51536607 |

#### H-Cyclopentane

|   |             |             |             |
|---|-------------|-------------|-------------|
| C | -1.29424400 | -0.14014200 | 0.00577400  |
| H | -1.94065800 | -0.11167600 | 0.88761200  |
| C | -0.23228500 | -1.26213800 | 0.13883800  |
| H | -0.17303800 | -1.59874300 | 1.17984100  |
| C | 1.09781900  | -0.60404400 | -0.25553000 |
| H | 1.20263700  | -0.58811400 | -1.34778700 |
| C | -0.49840600 | 1.18013800  | -0.15021800 |
| H | -0.92078900 | 2.00027100  | 0.43684900  |
| C | 0.93836700  | 0.82811500  | 0.26091500  |
| H | 1.68146500  | 1.52382300  | -0.13947800 |
| H | -1.94605400 | -0.30730700 | -0.85631300 |
| H | -0.50386700 | 1.49806600  | -1.19891000 |
| H | 1.02997900  | 0.83487600  | 1.35455200  |
| H | -0.46699400 | -2.14032700 | -0.46887300 |
| H | 1.96981300  | -1.12244400 | 0.15382900  |

#### F-Cyclopentane

|   |             |             |             |
|---|-------------|-------------|-------------|
| C | 0.00000000  | 0.00000000  | 0.00000000  |
| H | 0.00000000  | 0.00000000  | 1.09444844  |
| C | 1.39821335  | 0.00000000  | -0.62262699 |
| H | 2.10540578  | 0.50743829  | 0.04014934  |
| C | 1.25495865  | 0.75164417  | -1.97301774 |
| H | 1.60835292  | 0.15730684  | -2.81881809 |
| C | -0.70704311 | 1.18762444  | -0.63451968 |
| H | -0.34397001 | 2.11422039  | -0.17279727 |
| C | -0.24351647 | 1.09599499  | -2.09281391 |
| H | -0.78024651 | 0.27777893  | -2.58253602 |
| F | -0.66471834 | -1.15377496 | -0.41052979 |
| H | -1.79073939 | 1.13385716  | -0.50248527 |
| H | -0.42619871 | 2.00985563  | -2.66347822 |
| H | 1.73748429  | -1.03224866 | -0.73827038 |
| H | 1.84970982  | 1.67039106  | -1.95487375 |

#### Me-Cyclopentane

|   |             |             |             |
|---|-------------|-------------|-------------|
| C | 0.00000000  | 0.00000000  | 0.00000000  |
| H | 0.00000000  | 0.00000000  | 1.10063221  |
| C | 1.45611301  | 0.00000000  | -0.47881195 |
| H | 2.06441819  | -0.77548373 | -0.00257738 |
| C | 1.95801844  | 1.42645541  | -0.18617068 |
| H | 2.69796046  | 1.75722979  | -0.91991429 |
| C | -0.48817799 | 1.37184452  | -0.47877475 |

|   |             |             |             |
|---|-------------|-------------|-------------|
| H | -1.42284274 | 1.68486506  | -0.00271612 |
| C | 0.68734702  | 2.32288898  | -0.18571689 |
| H | 0.75064659  | 3.13150954  | -0.91881356 |
| C | -0.82821601 | -1.17383273 | -0.50248684 |
| H | -0.41831849 | -2.12874792 | -0.15762253 |
| H | -1.86528040 | -1.10783455 | -0.15759740 |
| H | -0.83918136 | -1.18935259 | -1.59889961 |
| H | -0.67379874 | 1.31786519  | -1.56031814 |
| H | 0.55700243  | 2.79367109  | 0.79365401  |
| H | 1.46746498  | -0.19327363 | -1.56029998 |
| H | 2.44606640  | 1.46166393  | 0.79278450  |

NH<sub>2</sub>-Cyclopentane

|   |             |             |             |
|---|-------------|-------------|-------------|
| C | 0.00000000  | 0.00000000  | 0.00000000  |
| H | 0.00000000  | 0.00000000  | 1.09935433  |
| C | 1.45121793  | 0.00000000  | -0.48491429 |
| H | 2.05510358  | -0.76780769 | 0.00468161  |
| C | 1.94500391  | 1.43553334  | -0.22999605 |
| H | 2.64999155  | 1.76400929  | -0.99800555 |
| C | -0.50179643 | 1.36821343  | -0.48851660 |
| H | -1.44269527 | 1.67483645  | -0.01981201 |
| C | 0.66573781  | 2.32285812  | -0.19251871 |
| H | 0.71271753  | 3.14972871  | -0.90586377 |
| N | -0.72508087 | -1.18681148 | -0.43350096 |
| H | -1.68644521 | -1.14260099 | -0.10118782 |
| H | -0.77892703 | -1.18481073 | -1.45192454 |
| H | -0.67811582 | 1.30053226  | -1.57138485 |
| H | 0.54524437  | 2.76876019  | 0.79974714  |
| H | 1.45181811  | -0.22004069 | -1.56179839 |
| H | 2.47268088  | 1.49195212  | 0.72680067  |

OH-Cyclopentane

|   |             |             |             |
|---|-------------|-------------|-------------|
| C | 0.00000000  | 0.00000000  | 0.00000000  |
| H | 0.00000000  | 0.00000000  | 1.09307422  |
| C | 1.40952334  | 0.00000000  | -0.59885286 |
| H | 2.02719257  | 0.73678731  | -0.07301052 |
| C | 1.19093110  | 0.43418110  | -2.06438690 |
| H | 1.09869358  | -0.44132428 | -2.71598892 |
| C | -0.61397030 | 1.26879182  | -0.59883909 |
| H | -0.22009790 | 2.14569380  | -0.07273779 |
| C | -0.12759691 | 1.26152819  | -2.06430459 |
| H | -0.87564694 | 0.79805254  | -2.71637606 |
| O | -0.72804265 | -1.16110510 | -0.37212118 |
| H | -0.75100967 | -1.19746647 | -1.33962880 |
| H | -1.70256496 | 1.27574333  | -0.50039551 |
| H | 0.02464799  | 2.27443359  | -2.44406290 |

|   |            |             |             |
|---|------------|-------------|-------------|
| H | 1.89012096 | -0.97676177 | -0.50016234 |
| H | 2.03663430 | 1.01164456  | -2.44477800 |

#### SH-Cyclopentane

|   |             |             |             |
|---|-------------|-------------|-------------|
| C | 0.00000000  | 0.00000000  | 0.00000000  |
| H | 0.00000000  | 0.00000000  | 1.09749253  |
| C | 1.44448488  | 0.00000000  | -0.50523776 |
| H | 2.06301994  | -0.75745139 | -0.01762485 |
| C | 1.91590814  | 1.44435463  | -0.25167998 |
| H | 2.63659921  | 1.77183055  | -1.00519467 |
| C | -0.53843513 | 1.34038112  | -0.50523470 |
| H | -1.47185686 | 1.63199631  | -0.01761910 |
| C | 0.62610205  | 2.31621570  | -0.25166880 |
| H | 0.66133078  | 3.10704433  | -1.00517143 |
| S | -0.99022403 | -1.46491429 | -0.43733010 |
| H | -0.88317625 | -1.30657002 | -1.77004376 |
| H | -0.73907829 | 1.25451848  | -1.58085972 |
| H | 0.50169384  | 2.80712505  | 0.71811371  |
| H | 1.43959825  | -0.21819508 | -1.58086121 |
| H | 2.41782972  | 1.51190790  | 0.71809184  |

#### C<sub>5</sub>-SiH<sub>3</sub>-Cyclopentane

|    |             |             |             |
|----|-------------|-------------|-------------|
| C  | 0.00000000  | 0.00000000  | 0.00000000  |
| H  | 0.00000000  | 0.00000000  | 1.10035568  |
| C  | 1.45920633  | 0.00000000  | -0.48710544 |
| H  | 2.07334037  | -0.76564820 | -0.00372117 |
| C  | 1.95479981  | 1.43370843  | -0.20282709 |
| H  | 2.69255291  | 1.76124404  | -0.94038301 |
| C  | -0.49543580 | 1.37252816  | -0.48708011 |
| H  | -1.42420325 | 1.69016464  | -0.00382029 |
| C  | 0.68476495  | 2.32542751  | -0.20250373 |
| H  | 0.74217438  | 3.13099706  | -0.93959841 |
| Si | -1.02345137 | -1.45753376 | -0.60747360 |
| H  | -0.45663476 | -2.74552405 | -0.13217603 |
| H  | -2.42735700 | -1.36176464 | -0.13209624 |
| H  | -1.02768695 | -1.46348140 | -2.09444664 |
| H  | -0.68736937 | 1.32924698  | -1.56758074 |
| H  | 0.55379372  | 2.79770484  | 0.77594443  |
| H  | 1.48365440  | -0.19543714 | -1.56756658 |
| H  | 2.44406930  | 1.47099329  | 0.77532368  |

#### Br-Cyclopentene

|   |             |            |            |
|---|-------------|------------|------------|
| C | -0.26914200 | 0.05987800 | 0.88287300 |
| H | 0.07613200  | 0.10231500 | 1.91432000 |
| C | -1.08287600 | 1.22522800 | 0.41321300 |



|    |             |             |             |
|----|-------------|-------------|-------------|
| H  | -0.84281700 | 2.24863700  | 0.67765700  |
| C  | -2.05079500 | 0.82360800  | -0.41215000 |
| H  | -2.74634700 | 1.48177500  | -0.92257200 |
| C  | -1.14268100 | -1.15051900 | 0.54447800  |
| H  | -1.78147600 | -1.34800600 | 1.41344100  |
| C  | -2.01815000 | -0.66989000 | -0.62525700 |
| H  | -1.54831100 | -0.89486400 | -1.59219700 |
| Br | 1.42271000  | -0.00395300 | -0.17182700 |
| H  | -0.56107200 | -2.04827000 | 0.33165100  |
| H  | -3.00908500 | -1.13305500 | -0.62728100 |

#### Cl-Cyclopentene

|    |             |             |             |
|----|-------------|-------------|-------------|
| C  | 0.34130500  | 0.03719000  | 0.74115900  |
| H  | 0.76428300  | 0.05998600  | 1.74554900  |
| C  | -0.51281300 | 1.22012300  | 0.38844600  |
| H  | -0.22426300 | 2.23728200  | 0.62789400  |
| C  | -1.58548200 | 0.84394200  | -0.30735500 |
| H  | -2.32910600 | 1.52118800  | -0.71499800 |
| C  | -0.58331500 | -1.16008600 | 0.48874400  |
| H  | -1.08432500 | -1.39347200 | 1.43456100  |
| C  | -1.62554600 | -0.64897600 | -0.52322100 |
| H  | -1.33997400 | -0.88633400 | -1.55605000 |
| Cl | 1.80375000  | -0.00956300 | -0.35710500 |
| H  | -0.03896000 | -2.04745100 | 0.16241500  |
| H  | -2.61630900 | -1.08177400 | -0.35523600 |

#### H-Cyclopentene

|   |             |             |             |
|---|-------------|-------------|-------------|
| C | 0.00000000  | 0.00000000  | 0.00000000  |
| H | 0.00000000  | 0.00000000  | 1.09507581  |
| C | 1.38945751  | 0.00000000  | -0.59351751 |
| H | 2.17624873  | -0.66661946 | -0.25399523 |
| C | 1.49855078  | 0.86422379  | -1.60081395 |
| H | 2.38773328  | 1.00877196  | -2.20675087 |
| C | -0.62270334 | 1.28505648  | -0.58920562 |
| H | -0.49480393 | 2.10318234  | 0.12655508  |
| C | 0.20128556  | 1.59462055  | -1.85865266 |
| H | -0.28211343 | 1.20191417  | -2.76380949 |
| H | -0.54733491 | -0.89917161 | -0.31482624 |
| H | -1.69227253 | 1.18617785  | -0.78986527 |
| H | 0.33698970  | 2.66970508  | -2.01667313 |

#### F-Cyclopentene

|   |             |             |            |
|---|-------------|-------------|------------|
| C | 0.79316900  | -0.00333000 | 0.40685000 |
| H | 1.07038200  | -0.03293700 | 1.46866900 |
| C | -0.04061300 | 1.20806400  | 0.08736700 |
| H | 0.37147500  | 2.21140500  | 0.09993200 |

|   |             |             |             |
|---|-------------|-------------|-------------|
| C | -1.30913500 | 0.87624900  | -0.14149900 |
| H | -2.11005200 | 1.57859700  | -0.35119200 |
| C | -0.10314400 | -1.17852100 | -0.00789000 |
| H | 0.00960700  | -2.05469000 | 0.63398000  |
| C | -1.53830500 | -0.61264800 | -0.03198900 |
| H | -2.13867100 | -1.01077300 | -0.85635100 |
| F | 1.98417300  | -0.01417300 | -0.30500300 |
| H | 0.20603600  | -1.45391700 | -1.02076900 |
| H | -2.07817100 | -0.84901000 | 0.89372200  |

#### Me-Cyclopentene

|   |             |             |             |
|---|-------------|-------------|-------------|
| C | 0.00000000  | 0.00000000  | 0.00000000  |
| H | 0.00000000  | 0.00000000  | 1.10114693  |
| C | 1.43350635  | 0.00000000  | -0.48608045 |
| H | 2.05483044  | -0.89153926 | -0.46475748 |
| C | 1.82944762  | 1.20595998  | -0.88831869 |
| H | 2.82520057  | 1.45274719  | -1.24407497 |
| C | -0.51932136 | 1.35794570  | -0.52494399 |
| H | -1.26135481 | 1.81312670  | 0.13679885  |
| C | 0.73327072  | 2.23459234  | -0.73120804 |
| H | 0.64232134  | 2.90315609  | -1.59374696 |
| C | -0.82281589 | -1.19313774 | -0.47991373 |
| H | -0.41727108 | -2.13692991 | -0.10094546 |
| H | -1.86217357 | -1.11437766 | -0.14446648 |
| H | -0.82115317 | -1.23913209 | -1.57448201 |
| H | -1.00071592 | 1.18976780  | -1.49607637 |
| H | 0.93216339  | 2.87132862  | 0.14188485  |

#### NH<sub>2</sub>-Cyclopentene

|   |             |             |             |
|---|-------------|-------------|-------------|
| C | 0.77088700  | 0.00045400  | 0.41068300  |
| H | 0.93463100  | -0.04351300 | 1.49750800  |
| C | -0.08748300 | 1.20305100  | 0.09113900  |
| H | 0.32137200  | 2.20844600  | 0.10352000  |
| C | -1.35297300 | 0.86647700  | -0.14843500 |
| H | -2.15715000 | 1.56369200  | -0.36284200 |
| C | -0.13269600 | -1.17546200 | -0.04103800 |
| H | -0.00275900 | -2.07509900 | 0.56748500  |
| C | -1.57265400 | -0.62423100 | -0.02246400 |
| H | -2.19810200 | -1.03686800 | -0.82108700 |
| N | 2.09378800  | 0.09718500  | -0.19992000 |
| H | 2.64291300  | -0.72657900 | 0.03737000  |
| H | 1.98879300  | 0.09011100  | -1.21374800 |
| H | 0.14211700  | -1.42787400 | -1.07284400 |
| H | -2.07881600 | -0.85434400 | 0.92477200  |

#### OH-Cyclopentene

|   |             |             |             |
|---|-------------|-------------|-------------|
| C | 0.84745800  | -0.01751000 | 0.47007400  |
| H | 1.40330400  | -0.04939400 | 1.41129700  |
| C | -0.03582800 | 1.20322900  | 0.33656900  |
| H | 0.33264200  | 2.20731400  | 0.52089100  |
| C | -1.24060300 | 0.88749900  | -0.13802300 |
| H | -2.02012100 | 1.60188800  | -0.38700900 |
| C | -0.16051000 | -1.18314500 | 0.36222200  |
| H | -0.42928800 | -1.52041200 | 1.36784000  |
| C | -1.41136400 | -0.60121400 | -0.33083300 |
| H | -1.45851400 | -0.84919400 | -1.39936500 |
| O | 1.85250800  | -0.03431100 | -0.53539000 |
| H | 1.41049700  | 0.15295500  | -1.37692000 |
| H | 0.28727700  | -2.02841600 | -0.16601100 |
| H | -2.34077900 | -0.97341100 | 0.11234300  |

#### SH-Cyclopentene

|   |             |             |             |
|---|-------------|-------------|-------------|
| C | 0.34326100  | -0.01266900 | 0.72743800  |
| H | 0.72685400  | -0.03165800 | 1.75143700  |
| C | -0.49715600 | 1.20054100  | 0.42645600  |
| H | -0.18057400 | 2.20315700  | 0.69331400  |
| C | -1.58647100 | 0.87770500  | -0.27069100 |
| H | -2.31312200 | 1.58735200  | -0.65330000 |
| C | -0.62375700 | -1.18141300 | 0.44599900  |
| H | -1.11786600 | -1.44852100 | 1.38642600  |
| C | -1.67583100 | -0.60877900 | -0.52530100 |
| H | -1.43702800 | -0.83312900 | -1.57372000 |
| S | 1.88006400  | -0.01910300 | -0.29380300 |
| H | 1.26589200  | 0.25853200  | -1.45742400 |
| H | -0.11057100 | -2.06774900 | 0.06878900  |
| H | -2.67488800 | -1.01463800 | -0.33807000 |

#### C<sub>5</sub>-SiH<sub>3</sub>-Cyclopentane

|    |             |             |             |
|----|-------------|-------------|-------------|
| C  | 0.29496100  | 0.03000900  | 0.78540100  |
| H  | 0.61141300  | 0.05967300  | 1.83476500  |
| C  | -0.56422400 | 1.21399400  | 0.40810800  |
| H  | -0.29986300 | 2.23465900  | 0.66920000  |
| C  | -1.61785800 | 0.85497300  | -0.32615000 |
| H  | -2.34306600 | 1.53889900  | -0.75489100 |
| C  | -0.65348500 | -1.16494100 | 0.50150100  |
| H  | -1.19634000 | -1.40967000 | 1.42087600  |
| C  | -1.65333300 | -0.63891000 | -0.55126500 |
| H  | -1.32695200 | -0.87811500 | -1.57299600 |
| Si | 1.83938800  | -0.00775500 | -0.31327600 |
| H  | 2.58465600  | 1.27331800  | -0.22484400 |
| H  | 2.74777900  | -1.11538500 | 0.08410700  |
| H  | 1.42233100  | -0.22026400 | -1.72232600 |

|   |             |             |             |
|---|-------------|-------------|-------------|
| H | -0.13643100 | -2.07339100 | 0.17527100  |
| H | -2.65131900 | -1.07190600 | -0.42887000 |

Acetylene

|   |            |            |             |
|---|------------|------------|-------------|
| C | 0.00000000 | 0.00000000 | 0.60101500  |
| H | 0.00000000 | 0.00000000 | 1.66778000  |
| C | 0.00000000 | 0.00000000 | -0.60101500 |
| H | 0.00000000 | 0.00000000 | -1.66778000 |

C<sub>5</sub>-Br-Syn-Acetylene

|    |             |             |             |
|----|-------------|-------------|-------------|
| C  | 0.10745000  | -0.77179000 | -0.00017100 |
| C  | 0.99913900  | -0.42671400 | 1.15888000  |
| H  | 0.66477900  | -0.48186600 | 2.18856500  |
| C  | 2.29038000  | -0.64726600 | 0.70562700  |
| H  | 3.17448300  | -0.68864700 | 1.33079900  |
| C  | 0.99930700  | -0.42619800 | -1.15899400 |
| H  | 0.66511300  | -0.48117800 | -2.18874300 |
| C  | 2.29050400  | -0.64698800 | -0.70561100 |
| H  | 3.17470200  | -0.68820600 | -1.33065800 |
| C  | 0.87222500  | 1.76158900  | 0.61616500  |
| C  | 0.87250700  | 1.76163800  | -0.61574100 |
| H  | -0.01731000 | -1.86121200 | -0.00042000 |
| Br | -1.71189400 | -0.10617600 | -0.00002800 |
| H  | 0.83282300  | 2.14595100  | -1.61319800 |
| H  | 0.83261800  | 2.14568600  | 1.61370700  |

C<sub>5</sub>-Cl-Syn-Acetylene

|    |             |             |             |
|----|-------------|-------------|-------------|
| C  | -0.36073500 | -0.80477100 | -0.00016800 |
| C  | 0.51915700  | -0.42227700 | 1.15934400  |
| H  | 0.18958900  | -0.49238500 | 2.18979300  |
| C  | 1.81784400  | -0.58196600 | 0.70600500  |
| H  | 2.70330300  | -0.58312500 | 1.33053400  |
| C  | 0.51923800  | -0.42181200 | -1.15946500 |
| H  | 0.18984100  | -0.49169100 | -2.18998100 |
| C  | 1.81792700  | -0.58169200 | -0.70599400 |
| H  | 2.70347800  | -0.58250500 | -1.33039400 |
| C  | 0.27969000  | 1.76187300  | 0.61584300  |
| C  | 0.27983900  | 1.76199700  | -0.61539800 |
| H  | -0.41994200 | -1.90113000 | -0.00038400 |
| Cl | -2.06144500 | -0.26430700 | -0.00006400 |
| H  | 0.22072500  | 2.13819500  | -1.61481500 |
| H  | 0.21981100  | 2.13775400  | 1.61533300  |

C<sub>5</sub>-F-Syn-Acetylene

|   |             |            |             |
|---|-------------|------------|-------------|
| C | 0.33443200  | 1.02531400 | -0.00032500 |
| C | -0.34915300 | 0.35242900 | 1.16054100  |

|   |             |             |             |
|---|-------------|-------------|-------------|
| H | -0.07393400 | 0.53969400  | 2.19264600  |
| C | -1.60715100 | 0.00504000  | 0.70824100  |
| H | -2.43240500 | -0.32119300 | 1.33015500  |
| C | -0.34924800 | 0.35183600  | -1.16075000 |
| H | -0.07440700 | 0.53836600  | -2.19308400 |
| C | -1.60722900 | 0.00464000  | -0.70790800 |
| H | -2.43260400 | -0.32189200 | -1.32951000 |
| C | 0.76817600  | -1.54568700 | 0.61547200  |
| C | 0.76795700  | -1.54608100 | -0.61487100 |
| H | 0.00870400  | 2.07915300  | -0.00058100 |
| F | 1.70217600  | 1.03515600  | -0.00029500 |
| H | 0.96825500  | -1.85849900 | -1.61765600 |
| H | 0.97011000  | -1.85697500 | 1.61829200  |

#### C<sub>5</sub>-Me-Syn-Acetylene

|   |             |             |             |
|---|-------------|-------------|-------------|
| C | 0.63489600  | 0.86761400  | 0.00009300  |
| C | -0.24266600 | 0.43593600  | 1.14973500  |
| H | 0.06361200  | 0.52469900  | 2.18817300  |
| C | -1.55705200 | 0.48765000  | 0.70316900  |
| H | -2.43804800 | 0.41119700  | 1.33012500  |
| C | -0.24257000 | 0.43614900  | -1.14967900 |
| H | 0.06375400  | 0.52508400  | -2.18808800 |
| C | -1.55698500 | 0.48778700  | -0.70321200 |
| H | -2.43792600 | 0.41146300  | -1.33026000 |
| C | 0.11428900  | -1.72666600 | 0.61678000  |
| C | 0.11444500  | -1.72658400 | -0.61698700 |
| H | 0.53534100  | 1.96922700  | 0.00019300  |
| C | 2.12359000  | 0.55837300  | 0.00008800  |
| H | 2.59896300  | 0.99823100  | -0.88297000 |
| H | 2.59919800  | 0.99900500  | 0.88263100  |
| H | 2.31865300  | -0.51374600 | 0.00052100  |
| H | 0.18457200  | -2.12324500 | -1.60837500 |
| H | 0.18420400  | -2.12346900 | 1.60812800  |

#### C<sub>5</sub>-NH<sub>2</sub>-Syn-Acetylene

|   |             |             |             |
|---|-------------|-------------|-------------|
| C | -0.53931800 | 0.94147400  | -0.01141800 |
| C | 0.28949400  | 0.41300000  | -1.15498800 |
| H | -0.01719000 | 0.53155900  | -2.18897800 |
| C | 1.59368500  | 0.30514800  | -0.70126900 |
| H | 2.46420700  | 0.12649700  | -1.32195100 |
| C | 0.28102600  | 0.41174500  | 1.15314500  |
| H | -0.01481200 | 0.54359500  | 2.19054900  |
| C | 1.59034400  | 0.31262200  | 0.70876900  |
| H | 2.45946900  | 0.14607700  | 1.33534700  |
| C | -0.36907300 | -1.68808800 | -0.60608000 |
| C | -0.36529500 | -1.67755200 | 0.62811100  |

|   |             |             |             |
|---|-------------|-------------|-------------|
| H | -0.33969700 | 2.02742700  | -0.01398600 |
| N | -1.97403000 | 0.78901100  | -0.10989000 |
| H | -2.21573400 | -0.19044500 | 0.01150700  |
| H | -2.42737100 | 1.30980700  | 0.63642900  |
| H | -0.47916000 | -2.06032200 | 1.62125200  |
| H | -0.49668100 | -2.06737400 | -1.59855800 |

C<sub>5</sub>-OH-Syn-Acetylene

|   |             |             |             |
|---|-------------|-------------|-------------|
| C | 0.40466900  | 1.01638400  | 0.00022100  |
| C | -0.33449700 | 0.37871400  | 1.15790900  |
| H | -0.05359300 | 0.54734700  | 2.19260900  |
| C | -1.61053900 | 0.09183900  | 0.70624200  |
| H | -2.45180500 | -0.19341800 | 1.32747700  |
| C | -0.33423400 | 0.37925000  | -1.15790700 |
| H | -0.05325700 | 0.54828000  | -2.19252700 |
| C | -1.61043200 | 0.09221700  | -0.70635900 |
| H | -2.45163800 | -0.19273000 | -1.32782200 |
| C | 0.64249400  | -1.58962000 | 0.61710300  |
| C | 0.64269100  | -1.58916400 | -0.61767200 |
| H | 0.09636700  | 2.07420300  | 0.00043900  |
| O | 1.79873100  | 1.03969700  | 0.00039900  |
| H | 2.08108700  | 0.11176800  | 0.00024300  |
| H | 0.82164300  | -1.94452700 | -1.61147400 |
| H | 0.82043900  | -1.94621000 | 1.61064500  |

C<sub>5</sub>-SH-Syn-Acetylene

|   |             |             |             |
|---|-------------|-------------|-------------|
| C | -0.39588200 | -0.77271700 | -0.00005100 |
| C | 0.51272000  | -0.43542600 | 1.15615800  |
| H | 0.18455100  | -0.49169600 | 2.18857100  |
| C | 1.80889600  | -0.63870000 | 0.70426500  |
| H | 2.69411200  | -0.66289800 | 1.32916700  |
| C | 0.51280200  | -0.43533800 | -1.15615100 |
| H | 0.18479300  | -0.49159600 | -2.18861400 |
| C | 1.80897100  | -0.63863400 | -0.70413100 |
| H | 2.69425000  | -0.66290700 | -1.32893800 |
| C | 0.39201300  | 1.74708100  | 0.61730700  |
| C | 0.39210400  | 1.74706200  | -0.61735800 |
| H | -0.46264900 | -1.87303400 | -0.00009600 |
| S | -2.14165700 | -0.28710300 | -0.00009900 |
| H | 0.36269800  | 2.14801100  | -1.60938500 |
| H | 0.36212600  | 2.14811300  | 1.60928500  |
| H | -1.94312500 | 1.03967600  | 0.00135000  |

C<sub>5</sub>-SiH<sub>3</sub>-Syn-Acetylene

|   |             |             |             |
|---|-------------|-------------|-------------|
| C | -0.29582600 | -0.85161400 | -0.00003100 |
| C | 0.59500500  | -0.43951000 | 1.14772100  |

|    |             |             |             |
|----|-------------|-------------|-------------|
| H  | 0.29174000  | -0.52413500 | 2.18702600  |
| C  | 1.91204600  | -0.50583700 | 0.70107700  |
| H  | 2.79175700  | -0.42466200 | 1.32933200  |
| C  | 0.59499700  | -0.43942000 | -1.14775400 |
| H  | 0.29162300  | -0.52386200 | -2.18704300 |
| C  | 1.91205200  | -0.50578900 | -0.70113900 |
| H  | 2.79176500  | -0.42446100 | -1.32937300 |
| C  | 0.23067200  | 1.69793200  | 0.61873500  |
| C  | 0.23070500  | 1.69804800  | -0.61858200 |
| H  | -0.29022900 | -1.95588400 | -0.00006700 |
| Si | -2.10155000 | -0.27599800 | -0.00002300 |
| H  | -2.41784100 | 0.51663100  | -1.21269700 |
| H  | -2.98886600 | -1.47177300 | -0.00033800 |
| H  | -2.41778100 | 0.51594900  | 1.21311100  |
| H  | 0.14590000  | 2.11679700  | -1.60059700 |
| H  | 0.14573100  | 2.11651600  | 1.60080700  |

#### C<sub>5</sub>-Br-Anti-Acetylene

|    |             |             |             |
|----|-------------|-------------|-------------|
| C  | -0.10715000 | -0.53006700 | -0.00021000 |
| H  | -0.16470000 | -1.61137300 | -0.00044700 |
| C  | -0.74464600 | 0.19186300  | 1.15860200  |
| H  | -0.53942800 | -0.07405700 | 2.18894200  |
| C  | -1.13001300 | 1.43970100  | 0.70626300  |
| H  | -1.48201900 | 2.25043100  | 1.33241900  |
| C  | -0.74461300 | 0.19230800  | -1.15871800 |
| H  | -0.53945500 | -0.07332700 | -2.18914500 |
| C  | -1.12997500 | 1.43997400  | -0.70586100 |
| H  | -1.48206200 | 2.25090800  | -1.33170700 |
| C  | -2.60280400 | -0.96050300 | 0.61728000  |
| C  | -2.60294900 | -0.96041500 | -0.61738700 |
| Br | 1.84150200  | -0.15037800 | 0.00000800  |
| H  | -2.93602000 | -1.17816900 | -1.61083900 |
| H  | -2.93600200 | -1.17834900 | 1.61067600  |

#### C<sub>5</sub>-Cl-Anti-Acetylene

|   |             |             |             |
|---|-------------|-------------|-------------|
| C | 0.41567500  | -0.57492300 | -0.00029900 |
| H | 0.27702700  | -1.64994000 | -0.00069500 |
| C | -0.19834200 | 0.17690600  | 1.15969600  |
| H | -0.00845600 | -0.09862200 | 2.19058600  |
| C | -0.52268700 | 1.43934300  | 0.70804900  |
| H | -0.83742100 | 2.26666700  | 1.33255200  |
| C | -0.19809500 | 0.17765000  | -1.15984600 |
| H | -0.00863100 | -0.09731500 | -2.19096500 |
| C | -0.52263400 | 1.43977900  | -0.70722900 |
| H | -0.83733300 | 2.26752200  | -1.33119800 |

|    |             |             |             |
|----|-------------|-------------|-------------|
| C  | -2.11055100 | -0.89233400 | 0.61667500  |
| C  | -2.11077800 | -0.89197200 | -0.61699000 |
| Cl | 2.22329400  | -0.33855700 | -0.00001000 |
| H  | -2.44854500 | -1.08913100 | -1.61297700 |
| H  | -2.44816400 | -1.09040900 | 1.61253800  |

C<sub>5</sub>-F-Anti-Acetylene

|   |             |             |             |
|---|-------------|-------------|-------------|
| C | 0.65480000  | -0.76600600 | -0.00088800 |
| H | 0.28377700  | -1.78892100 | -0.00220700 |
| C | 0.19576700  | 0.10038000  | 1.16366000  |
| H | 0.31445300  | -0.20396700 | 2.19750000  |
| C | 0.14822900  | 1.39673000  | 0.71344700  |
| H | 0.01875800  | 2.27604900  | 1.33382300  |
| C | 0.19607700  | 0.10308600  | -1.16359900 |
| H | 0.31479300  | -0.19920100 | -2.19804700 |
| C | 0.14839800  | 1.39834200  | -0.71052400 |
| H | 0.01850200  | 2.27898600  | -1.32893400 |
| C | -1.90633800 | -0.57256800 | 0.61508000  |
| C | -1.90664500 | -0.57068700 | -0.61622100 |
| F | 2.04307100  | -0.83546500 | -0.00073600 |
| H | -2.26024200 | -0.68754600 | -1.61885900 |
| H | -2.25941200 | -0.69187800 | 1.61761700  |

C<sub>5</sub>-Me-Anti-Acetylene

|   |             |             |             |
|---|-------------|-------------|-------------|
| C | -0.70900400 | 0.71262900  | 0.00095300  |
| H | -0.39387800 | 1.75606600  | 0.00244800  |
| C | -0.13718600 | -0.09079400 | 1.14923600  |
| H | -0.28101300 | 0.18951000  | 2.18868300  |
| C | 0.03360000  | -1.39253100 | 0.70333300  |
| H | 0.26220700  | -2.24835200 | 1.32822700  |
| C | -0.13630900 | -0.08781500 | -1.14903500 |
| H | -0.28007400 | 0.19487800  | -2.18785300 |
| C | 0.03403800  | -1.39085100 | -0.70615200 |
| H | 0.26292900  | -2.24521300 | -1.33292700 |
| C | 1.89684000  | 0.68834400  | 0.61804000  |
| C | 1.89627000  | 0.68927200  | -0.61665700 |
| C | -2.24895300 | 0.65863200  | 0.00019500  |
| H | -2.65061900 | 1.16173600  | 0.88524800  |
| H | -2.64987900 | 1.16517200  | -0.88324100 |
| H | -2.59883400 | -0.37662400 | -0.00195000 |
| H | 2.27683900  | 0.84188800  | -1.60520900 |
| H | 2.27654300  | 0.83963000  | 1.60710000  |

C<sub>5</sub>-NH<sub>2</sub>-Anti-Acetylene

|   |             |             |             |
|---|-------------|-------------|-------------|
| C | -0.70497000 | -0.73136300 | -0.05081500 |
| H | -0.35269400 | -1.76021400 | -0.10629100 |



|   |             |             |             |
|---|-------------|-------------|-------------|
| C | -0.15368000 | 0.16068300  | -1.15067800 |
| H | -0.29146900 | -0.07445700 | -2.20070900 |
| C | -0.02373500 | 1.43229800  | -0.63138200 |
| H | 0.18086300  | 2.32967400  | -1.20416900 |
| C | -0.16439900 | 0.03315900  | 1.15696400  |
| H | -0.29926800 | -0.31329000 | 2.17781900  |
| C | -0.03032600 | 1.35513900  | 0.78564800  |
| H | 0.16060600  | 2.18600100  | 1.45544100  |
| C | 1.90430900  | -0.61808000 | -0.64125400 |
| C | 1.89671300  | -0.68428200 | 0.58957300  |
| N | -2.17188700 | -0.76764300 | -0.14337300 |
| H | -2.53962600 | -1.28200000 | 0.65515200  |
| H | -2.52283100 | 0.18551600  | -0.05721500 |
| H | 2.25548400  | -0.87823600 | 1.57853600  |
| H | 2.26866400  | -0.70481800 | -1.64328800 |

C<sub>5</sub>-OH-Anti-Acetylene

|   |             |             |             |
|---|-------------|-------------|-------------|
| C | -0.67663100 | -0.76634600 | -0.00065000 |
| H | -0.30155600 | -1.78647000 | -0.00160100 |
| C | -0.17833100 | 0.09314100  | -1.16095200 |
| H | -0.29996600 | -0.20652200 | -2.19654100 |
| C | -0.10914400 | 1.39183800  | -0.71140100 |
| H | 0.04137200  | 2.26954900  | -1.32977600 |
| C | -0.17814500 | 0.09109400  | 1.16101200  |
| H | -0.29967400 | -0.21004500 | 2.19619000  |
| C | -0.10910400 | 1.39054800  | 0.71364400  |
| H | 0.04154000  | 2.26714200  | 1.33357500  |
| C | 1.91335200  | -0.58648100 | -0.61608100 |
| C | 1.91267900  | -0.58809100 | 0.61525200  |
| O | -2.08999900 | -0.88545000 | -0.00086400 |
| H | -2.44396100 | 0.01769900  | 0.00116800  |
| H | 2.26665000  | -0.71297500 | 1.61676500  |
| H | 2.26753100  | -0.70899300 | -1.61780300 |

C<sub>5</sub>-SH-Anti-Acetylene

|   |             |             |             |
|---|-------------|-------------|-------------|
| C | -0.42999600 | -0.57169300 | 0.00039100  |
| H | -0.27823800 | -1.64864100 | 0.00089000  |
| C | 0.21411900  | 0.15969000  | -1.15516100 |
| H | 0.02421500  | -0.11116200 | -2.18789100 |
| C | 0.55001700  | 1.42582400  | -0.70673600 |
| H | 0.88055200  | 2.24622600  | -1.33265900 |
| C | 0.21392900  | 0.16073700  | 1.15537800  |
| H | 0.02417200  | -0.10941400 | 2.18831200  |
| C | 0.54990700  | 1.42647000  | 0.70583400  |
| H | 0.88040500  | 2.24742600  | 1.33105300  |
| C | 2.12396300  | -0.88631600 | -0.61722100 |

|   |             |             |             |
|---|-------------|-------------|-------------|
| C | 2.12405200  | -0.88630900 | 0.61759000  |
| H | -2.27483000 | 0.94657400  | 0.00034600  |
| S | -2.26737900 | -0.39762400 | -0.00006200 |
| H | 2.47284500  | -1.08963000 | 1.60872100  |
| H | 2.47300300  | -1.08981900 | -1.60823700 |

C<sub>5</sub>-SiH<sub>3</sub>-Anti-Acetylene

|    |             |             |             |
|----|-------------|-------------|-------------|
| C  | -0.38458500 | 0.63472300  | -0.00015700 |
| H  | -0.23520700 | 1.71538700  | -0.00035700 |
| C  | 0.24991300  | -0.09685200 | 1.14314800  |
| H  | 0.08211900  | 0.17044100  | 2.18225600  |
| C  | 0.52417100  | -1.39786400 | 0.69777200  |
| H  | 0.82240000  | -2.22590700 | 1.32973500  |
| C  | 0.24978900  | -0.09732000 | -1.14328600 |
| H  | 0.08191000  | 0.16979600  | -2.18242600 |
| C  | 0.52411700  | -1.39815500 | -0.69736400 |
| H  | 0.82241000  | -2.22641900 | -1.32900700 |
| C  | 2.18738700  | 0.80673500  | 0.61930800  |
| C  | 2.18738500  | 0.80668500  | -0.61948700 |
| Si | -2.26238300 | 0.29688500  | 0.00002200  |
| H  | -2.87657500 | 0.92336400  | 1.19893200  |
| H  | -2.87665500 | 0.92194400  | -1.19959300 |
| H  | -2.55171900 | -1.15378900 | 0.00082400  |
| H  | 2.58774800  | 1.00041200  | -1.59383700 |
| H  | 2.58787700  | 1.00066400  | 1.59357000  |

Maleic Anhydride (MA)

|   |             |             |             |
|---|-------------|-------------|-------------|
| C | -0.00109300 | 1.25976300  | -0.66485900 |
| H | -0.00206600 | 2.08670600  | -1.36184400 |
| C | -0.00109300 | 1.25976300  | 0.66485900  |
| H | -0.00206600 | 2.08670600  | 1.36184400  |
| C | 0.00023300  | -0.16277200 | 1.12414800  |
| C | 0.00023300  | -0.16277200 | -1.12414800 |
| O | 0.00023300  | -0.60099200 | -2.23100700 |
| O | 0.00023300  | -0.60099200 | 2.23100700  |
| O | 0.00133900  | -0.96517800 | 0.00000000  |

C<sub>5</sub>-Br-Syn-MA

|   |             |             |             |
|---|-------------|-------------|-------------|
| C | 1.25388600  | 0.00212500  | 0.98152800  |
| C | 0.30630200  | -1.15855200 | 1.10977000  |
| C | -0.73416500 | -0.69931000 | 1.91126500  |
| C | 0.30651800  | 1.16366200  | 1.10407200  |
| C | -0.73394900 | 0.70863100  | 1.90794500  |
| C | -0.56706500 | -0.69246900 | -0.90730600 |
| H | 0.13932000  | -1.34989200 | -1.39500600 |
| C | -0.56711900 | 0.68861200  | -0.91025400 |

|    |             |             |             |
|----|-------------|-------------|-------------|
| H  | 0.13887200  | 1.34391700  | -1.40140600 |
| C  | -1.95469100 | 1.13169700  | -0.62737300 |
| C  | -1.95461900 | -1.13457900 | -0.62306700 |
| O  | -2.42487200 | -2.23098400 | -0.58042900 |
| O  | -2.42499300 | 2.22812900  | -0.58807600 |
| O  | -2.70949300 | -0.00110800 | -0.36056900 |
| Br | 2.51265300  | -0.00119300 | -0.49221600 |
| H  | 0.61297800  | 2.19700700  | 0.99041600  |
| H  | 1.89137700  | 0.00426900  | 1.87310400  |
| H  | 0.61192100  | -2.19261900 | 1.00060500  |
| H  | -1.49682400 | -1.32536700 | 2.35959000  |
| H  | -1.49621400 | 1.33723400  | 2.35336200  |

C<sub>5</sub>-Cl-Syn-MA

|    |             |             |             |
|----|-------------|-------------|-------------|
| C  | 1.82916800  | -0.00080200 | 0.59104100  |
| C  | 0.91241500  | -1.16316200 | 0.86958300  |
| C  | 0.01416200  | -0.70644300 | 1.82603300  |
| C  | 0.91281700  | 1.16127500  | 0.87209400  |
| C  | 0.01436300  | 0.70293600  | 1.82746300  |
| C  | -0.26723200 | -0.68897500 | -0.99560400 |
| H  | 0.35035400  | -1.34730900 | -1.59080200 |
| C  | -0.26673600 | 0.69025600  | -0.99467600 |
| H  | 0.35144600  | 1.34857100  | -1.58927200 |
| C  | -1.58818900 | 1.13377600  | -0.48554900 |
| C  | -1.58897200 | -1.13231200 | -0.48682000 |
| O  | -2.04759300 | -2.22866900 | -0.37301800 |
| O  | -2.04659600 | 2.23002300  | -0.37055100 |
| O  | -2.28633400 | 0.00043500  | -0.09478300 |
| Cl | 2.75682500  | 0.00077300  | -0.93201500 |
| H  | 1.19467600  | 2.19571000  | 0.71303800  |
| H  | 2.58889700  | -0.00187500 | 1.38327100  |
| H  | 1.19379800  | -2.19739600 | 0.70833800  |
| H  | -0.66612100 | -1.33268800 | 2.39117500  |
| H  | -0.66567500 | 1.32824000  | 2.39393300  |

C<sub>5</sub>-F-Syn-MA

|   |             |             |             |
|---|-------------|-------------|-------------|
| C | 2.11607200  | -0.00010600 | -0.02652000 |
| C | 1.31817000  | -1.16373200 | 0.50187800  |
| C | 0.68518100  | -0.70644800 | 1.64566100  |
| C | 1.31849900  | 1.16408200  | 0.50115200  |
| C | 0.68539800  | 0.70780300  | 1.64520400  |
| C | -0.23506100 | -0.68864300 | -1.07459100 |
| H | 0.25449700  | -1.34794400 | -1.77729200 |
| C | -0.23515300 | 0.68832700  | -1.07482200 |
| H | 0.25421900  | 1.34747000  | -1.77780500 |
| C | -1.40906400 | 1.13322400  | -0.28458600 |

|   |             |             |             |
|---|-------------|-------------|-------------|
| C | -1.40889900 | -1.13346700 | -0.28418700 |
| O | -1.83017800 | -2.22984900 | -0.07036000 |
| O | -1.83054800 | 2.22960400  | -0.07113200 |
| O | -2.00387100 | -0.00010500 | 0.25062200  |
| F | 2.36396600  | -0.00056000 | -1.37571900 |
| H | 0.16993600  | 1.33102800  | 2.36636000  |
| H | 0.16936300  | -1.32897200 | 2.36716500  |
| H | 1.54478100  | -2.19933700 | 0.27616900  |
| H | 3.09193900  | -0.00009900 | 0.48398900  |
| H | 1.54549300  | 2.19944600  | 0.27470100  |

C<sub>5</sub>-Me-Syn-MA

|   |             |             |             |
|---|-------------|-------------|-------------|
| C | 2.13375200  | 0.00007000  | 0.13085300  |
| C | 1.27071000  | -1.15195200 | 0.58427400  |
| C | 0.51488800  | -0.70106300 | 1.66533300  |
| C | 1.27076800  | 1.15234500  | 0.58377700  |
| C | 0.51493300  | 0.70194600  | 1.66504200  |
| C | -0.20440100 | -0.69130200 | -1.04902900 |
| H | 0.29014800  | -1.35938000 | -1.74082300 |
| C | -0.20448300 | 0.69116900  | -1.04914400 |
| H | 0.28981100  | 1.35918000  | -1.74119000 |
| C | -1.43234700 | 1.13239600  | -0.34606100 |
| C | -1.43217500 | -1.13262700 | -0.34579400 |
| O | -1.87027900 | -2.22934000 | -0.16578300 |
| O | -1.87079600 | 2.22900700  | -0.16630200 |
| O | -2.06603900 | -0.00021400 | 0.14272300  |
| H | -0.08233400 | 1.33042100  | 2.31541200  |
| H | -0.08242200 | -1.32924200 | 2.31594800  |
| H | 1.51046800  | -2.19312200 | 0.39254200  |
| H | 2.96350300  | 0.00023700  | 0.86143500  |
| H | 1.51075600  | 2.19342700  | 0.39182100  |
| C | 2.76938700  | -0.00030000 | -1.25158900 |
| H | 3.40430000  | -0.88346200 | -1.37102300 |
| H | 2.04107200  | 0.00017100  | -2.06416500 |
| H | 3.40541800  | 0.88205100  | -1.37103200 |

C<sub>5</sub>-NH<sub>2</sub>-Syn-MA

|   |             |             |             |
|---|-------------|-------------|-------------|
| C | 2.12899700  | -0.00030200 | 0.06992000  |
| C | 1.28835100  | -1.15467200 | 0.55880400  |
| C | 0.57955400  | -0.70326000 | 1.66488400  |
| C | 1.28895900  | 1.15487700  | 0.55800300  |
| C | 0.57986200  | 0.70467200  | 1.66434500  |
| C | -0.21724400 | -0.68875800 | -1.06517800 |
| H | 0.30099900  | -1.33869800 | -1.75462200 |
| C | -0.21694400 | 0.68791600  | -1.06572300 |
| H | 0.30154100  | 1.33728600  | -1.75550900 |

|   |             |             |             |
|---|-------------|-------------|-------------|
| C | -1.42319700 | 1.13304100  | -0.32865300 |
| C | -1.42392800 | -1.13277100 | -0.32795300 |
| O | -1.85644600 | -2.22923300 | -0.13133800 |
| O | -1.85529700 | 2.22967800  | -0.13239400 |
| O | -2.04541000 | 0.00021000  | 0.17770700  |
| N | 2.52250400  | -0.00088500 | -1.32865700 |
| H | 3.11020800  | 0.81068100  | -1.50996400 |
| H | 3.10724500  | -0.81457300 | -1.51005900 |
| H | 0.01450000  | 1.33271700  | 2.34274200  |
| H | 0.01410300  | -1.33052900 | 2.34392200  |
| H | 3.00249800  | -0.00030000 | 0.75379700  |
| H | 1.52063100  | -2.19512700 | 0.35490800  |
| H | 1.52150400  | 2.19503300  | 0.35289000  |

#### C<sub>5</sub>-OH-Syn-MA

|   |             |             |             |
|---|-------------|-------------|-------------|
| C | 2.12151700  | 0.00263500  | 0.01742000  |
| C | 1.29682600  | -1.16043300 | 0.53226200  |
| C | 0.63031800  | -0.70327000 | 1.65884400  |
| C | 1.30623700  | 1.15974400  | 0.53134200  |
| C | 0.63094800  | 0.70862700  | 1.65427800  |
| C | -0.22587200 | -0.69071800 | -1.06866900 |
| H | 0.28050700  | -1.34678000 | -1.76158100 |
| C | -0.22622900 | 0.68603000  | -1.07325700 |
| H | 0.28600900  | 1.33992500  | -1.76458600 |
| C | -1.41590500 | 1.13188400  | -0.30942000 |
| C | -1.41754900 | -1.13467500 | -0.30668600 |
| O | -1.84450600 | -2.23145100 | -0.10156700 |
| O | -1.84354400 | 2.22795000  | -0.10425400 |
| O | -2.02617500 | -0.00153300 | 0.21157500  |
| O | 2.43800900  | 0.07324600  | -1.34710900 |
| H | 3.15758200  | -0.54669700 | -1.52751600 |
| H | 3.04518600  | 0.00548500  | 0.62492400  |
| H | 1.52130300  | -2.20134500 | 0.32279700  |
| H | 0.09031800  | -1.32459700 | 2.36379600  |
| H | 0.08813400  | 1.33545800  | 2.35186500  |
| H | 1.53894100  | 2.19390500  | 0.30446300  |

#### C<sub>5</sub>-SH-Syn-MA

|   |             |             |             |
|---|-------------|-------------|-------------|
| C | 1.81708600  | 0.05626400  | 0.60115700  |
| C | 0.90506200  | -1.08987000 | 0.95780900  |
| C | -0.02143500 | -0.58960100 | 1.86709600  |
| C | 0.87846900  | 1.22048200  | 0.81493800  |
| C | -0.03184700 | 0.81383700  | 1.78764500  |
| C | -0.25082100 | -0.72692100 | -0.95149800 |
| H | 0.37228100  | -1.40414600 | -1.52165400 |
| C | -0.27085500 | 0.65429000  | -1.00707600 |

|   |             |             |             |
|---|-------------|-------------|-------------|
| H | 0.33777800  | 1.29272200  | -1.63282300 |
| C | -1.61151300 | 1.09327500  | -0.54502600 |
| C | -1.57246700 | -1.17103600 | -0.44710200 |
| O | -2.01641000 | -2.26890700 | -0.29440000 |
| O | -2.09155800 | 2.18507100  | -0.48748300 |
| O | -2.29796100 | -0.03418600 | -0.12058900 |
| S | 2.76026800  | -0.09494800 | -0.95118900 |
| H | 3.86928800  | 0.50868700  | -0.49958200 |
| H | -0.73074900 | 1.46528600  | 2.29960400  |
| H | -0.71236800 | -1.19023500 | 2.44695400  |
| H | 1.14776900  | 2.24958300  | 0.60340600  |
| H | 2.55405800  | 0.10719000  | 1.41504200  |
| H | 1.19500900  | -2.13006000 | 0.86019900  |

#### C<sub>5</sub>-SiH<sub>3</sub>-Syn-MA

|    |             |             |             |
|----|-------------|-------------|-------------|
| C  | 1.78552900  | 0.02958000  | 0.65062100  |
| C  | 0.84853100  | -1.11497100 | 0.94892600  |
| C  | -0.11626200 | -0.64086300 | 1.84428400  |
| C  | 0.84471300  | 1.18536300  | 0.88664100  |
| C  | -0.11832200 | 0.75624800  | 1.80668900  |
| C  | -0.25617600 | -0.71018000 | -0.93698600 |
| H  | 0.36043400  | -1.37648000 | -1.52558800 |
| C  | -0.27088300 | 0.67657300  | -0.96754000 |
| H  | 0.33000100  | 1.32874800  | -1.58657600 |
| C  | -1.62508100 | 1.10998500  | -0.54706300 |
| C  | -1.60036200 | -1.15524600 | -0.49842900 |
| O  | -2.05587500 | -2.25416500 | -0.39066100 |
| O  | -2.10432800 | 2.20232200  | -0.48619300 |
| O  | -2.33182900 | -0.02288800 | -0.17244700 |
| Si | 2.95594100  | -0.02239700 | -0.83804200 |
| H  | 3.89070400  | 1.12210700  | -0.72726100 |
| H  | 3.72023900  | -1.29081500 | -0.76812800 |
| H  | 2.26339100  | 0.04899100  | -2.14431100 |
| H  | 1.11749500  | 2.22430500  | 0.73134700  |
| H  | -0.84237400 | 1.39912600  | 2.29404900  |
| H  | -0.83838000 | -1.25825200 | 2.36607600  |
| H  | 1.12628200  | -2.15937200 | 0.84865500  |
| H  | 2.47517100  | 0.05409900  | 1.51587100  |

#### C<sub>5</sub>-Br-Anti-MA

|   |             |             |             |
|---|-------------|-------------|-------------|
| C | -1.07210100 | -0.00004200 | 0.53499500  |
| C | -0.39433600 | -1.15947100 | -0.14825100 |
| C | 0.06942500  | -0.70384000 | -1.37539900 |
| C | -0.39464200 | 1.15947300  | -0.14834600 |
| C | 0.06935300  | 0.70378700  | -1.37540400 |
| C | 1.37750700  | -0.69259600 | 1.14414400  |

|    |             |             |             |
|----|-------------|-------------|-------------|
| H  | 1.04106000  | -1.35531900 | 1.92998900  |
| C  | 1.37754600  | 0.69231800  | 1.14449200  |
| H  | 1.04068100  | 1.35479200  | 1.93036500  |
| Br | -2.98548400 | -0.00008200 | 0.06799000  |
| C  | 2.42360100  | 1.13452700  | 0.19020500  |
| C  | 2.42398000  | -1.13432500 | 0.19002800  |
| O  | 2.92508600  | 0.00020500  | -0.43069200 |
| O  | 2.81503200  | -2.22949000 | -0.07761900 |
| O  | 2.81415400  | 2.22983800  | -0.07754800 |
| H  | -1.05961800 | -0.00003300 | 1.62089300  |
| H  | -0.60122000 | 2.19336400  | 0.10139100  |
| H  | -0.60109800 | -2.19332700 | 0.10147800  |
| H  | 0.47806100  | -1.33189400 | -2.15782000 |
| H  | 0.47788400  | 1.33185300  | -2.15786900 |

#### C<sub>5</sub>-Cl-Anti-MA

|    |             |             |             |
|----|-------------|-------------|-------------|
| C  | -1.62903900 | -0.00010800 | 0.53690900  |
| C  | -0.94367500 | -1.16085000 | -0.14970600 |
| C  | -0.48511000 | -0.70529600 | -1.37544400 |
| C  | -0.94383700 | 1.16100000  | -0.14925300 |
| C  | -0.48519000 | 0.70599900  | -1.37515900 |
| C  | 0.83307300  | -0.69182200 | 1.14728400  |
| H  | 0.49385300  | -1.35608000 | 1.93062600  |
| C  | 0.83313800  | 0.69158700  | 1.14744700  |
| H  | 0.49393500  | 1.35569200  | 1.93092600  |
| C  | 1.87453000  | 1.13429400  | 0.18810600  |
| C  | 1.87454200  | -1.13439000 | 0.18796500  |
| O  | 2.37123300  | 0.00000000  | -0.43670800 |
| O  | 2.26454000  | -2.22951700 | -0.08082000 |
| O  | 2.26440600  | 2.22948000  | -0.08065900 |
| Cl | -3.39590800 | -0.00015300 | 0.14522900  |
| H  | -1.58162300 | -0.00031700 | 1.62297100  |
| H  | -1.14678600 | 2.19543500  | 0.10160200  |
| H  | -0.07728400 | 1.33262200  | -2.15929300 |
| H  | -0.07713700 | -1.33154900 | -2.15983800 |
| H  | -1.14655900 | -2.19540200 | 0.10071700  |

#### C<sub>5</sub>-F-Anti-MA

|   |             |             |             |
|---|-------------|-------------|-------------|
| C | -1.95122300 | 0.00004900  | 0.57426600  |
| C | -1.26994100 | -1.16564400 | -0.12944200 |
| C | -0.84552600 | -0.71073100 | -1.35925500 |
| C | -1.26959000 | 1.16555100  | -0.12939500 |
| C | -0.84538800 | 0.71055900  | -1.35925500 |
| C | 0.53922800  | -0.68930400 | 1.16365400  |
| H | 0.20181700  | -1.35744700 | 1.94437500  |
| C | 0.53920700  | 0.68949600  | 1.16352500  |

|   |             |             |             |
|---|-------------|-------------|-------------|
| H | 0.20194200  | 1.35754900  | 1.94439000  |
| C | 1.54715200  | 1.13418800  | 0.17039100  |
| C | 1.54695800  | -1.13425200 | 0.17046600  |
| O | 2.02283700  | -0.00009500 | -0.47090400 |
| O | 1.92900300  | -2.22953700 | -0.10886000 |
| O | 1.92927400  | 2.22940000  | -0.10908700 |
| F | -3.29996200 | 0.00028300  | 0.27129600  |
| H | -0.46019400 | 1.33153100  | -2.15973500 |
| H | -0.46046200 | -1.33178300 | -2.15973800 |
| H | -1.45559100 | -2.20290400 | 0.12391800  |
| H | -1.86699900 | 0.00001300  | 1.66233600  |
| H | -1.45503300 | 2.20288000  | 0.12386000  |

#### C<sub>5</sub>-Me-Anti-MA

|   |             |             |             |
|---|-------------|-------------|-------------|
| C | 1.96761200  | -0.00026800 | -0.57162000 |
| C | 1.24982600  | -1.15100500 | 0.09790600  |
| C | 0.79940600  | -0.70249100 | 1.33651000  |
| C | 1.24973900  | 1.15088200  | 0.09707800  |
| C | 0.79939300  | 0.70309300  | 1.33605800  |
| C | -0.54891400 | -0.69230200 | -1.13652200 |
| H | -0.22594200 | -1.35340000 | -1.92883900 |
| C | -0.54879900 | 0.69249600  | -1.13632200 |
| H | -0.22610600 | 1.35362500  | -1.92873400 |
| C | -1.58418700 | 1.13355900  | -0.17304900 |
| C | -1.58401100 | -1.13373300 | -0.17320300 |
| O | -2.07950300 | -0.00014400 | 0.45515900  |
| O | -1.97342200 | -2.22908700 | 0.10074600  |
| O | -1.97387500 | 2.22884200  | 0.10089800  |
| C | 3.46933200  | 0.00011500  | -0.22124600 |
| H | 3.95658200  | -0.88410600 | -0.64147600 |
| H | 3.95579500  | 0.88550800  | -0.63991400 |
| H | 3.61484700  | -0.00075500 | 0.86136700  |
| H | 1.43607800  | 2.19240600  | -0.14473700 |
| H | 0.39046600  | 1.33185700  | 2.11856000  |
| H | 0.39053800  | -1.33076200 | 2.11943600  |
| H | 1.43588100  | -2.19264300 | -0.14359500 |
| H | 1.86987800  | -0.00068900 | -1.66003600 |

#### C<sub>5</sub>-NH<sub>2</sub>-Anti-MA

|   |             |             |             |
|---|-------------|-------------|-------------|
| C | -1.97613000 | -0.00020700 | 0.56910900  |
| C | -1.25928800 | -1.16215000 | -0.09815800 |
| C | -0.81321100 | -0.72703500 | -1.33534600 |
| C | -1.25774200 | 1.15281400  | -0.12936100 |
| C | -0.81223500 | 0.68792000  | -1.35571300 |
| C | 0.54670000  | -0.68339400 | 1.15060700  |
| H | 0.21442100  | -1.34527400 | 1.93846900  |



|   |             |             |             |
|---|-------------|-------------|-------------|
| C | 0.54388900  | 0.69807600  | 1.14367200  |
| H | 0.20616200  | 1.36602800  | 1.92404600  |
| C | 1.56743600  | 1.13972900  | 0.16784900  |
| C | 1.57393100  | -1.12799500 | 0.17856700  |
| O | 2.05892400  | 0.00421500  | -0.46020000 |
| O | 1.96490300  | -2.22328000 | -0.09148900 |
| O | 1.95250300  | 2.23486200  | -0.11185600 |
| N | -3.41388700 | -0.08935700 | 0.29723700  |
| H | -3.87939800 | 0.73333000  | 0.67487000  |
| H | -3.56538900 | -0.07580400 | -0.71002500 |
| H | -1.43552900 | 2.19799600  | 0.10428200  |
| H | -0.41074200 | 1.30022400  | -2.15510500 |
| H | -0.40632400 | -1.36275700 | -2.11345300 |
| H | -1.45633300 | -2.19600400 | 0.16249600  |
| H | -1.86040000 | 0.01482700  | 1.65477400  |

C<sub>5</sub>-OH-Anti-MA

|   |             |             |             |
|---|-------------|-------------|-------------|
| C | -1.96888300 | -0.00082200 | -0.56347700 |
| C | -1.26528400 | 1.15545800  | 0.14557400  |
| C | -0.82470800 | 0.68870100  | 1.36753700  |
| C | -1.26576500 | -1.16620900 | 0.11588200  |
| C | -0.82408700 | -0.72840400 | 1.34821500  |
| C | 0.54023800  | 0.69587800  | -1.15604000 |
| H | 0.19763700  | 1.36520600  | -1.93316500 |
| C | 0.54312900  | -0.68358900 | -1.16092500 |
| H | 0.20676300  | -1.34919300 | -1.94397900 |
| C | 1.56150800  | -1.12778200 | -0.17920500 |
| C | 1.55411100  | 1.14008200  | -0.17118200 |
| O | 2.04100900  | 0.00566800  | 0.46157000  |
| O | 1.93514000  | 2.23609200  | 0.11012800  |
| O | 1.95056000  | -2.22259000 | 0.09418300  |
| O | -3.34135700 | -0.08302400 | -0.22128400 |
| H | -1.44027300 | 2.20051900  | -0.08976800 |
| H | -1.85039800 | 0.01290100  | -1.65239400 |
| H | -1.45999700 | -2.20015700 | -0.14516900 |
| H | -0.42575700 | -1.36227700 | 2.13199600  |
| H | -0.42914100 | 1.30101800  | 2.16978200  |
| H | -3.78320400 | 0.70293000  | -0.57234800 |

C<sub>5</sub>-SH-Anti-MA

|   |             |             |             |
|---|-------------|-------------|-------------|
| C | 1.64477300  | 0.00041300  | -0.53310800 |
| C | 0.93701000  | -1.15628900 | 0.13181400  |
| C | 0.46865700  | -0.70433800 | 1.36154800  |
| C | 0.93718500  | 1.15652800  | 0.13298300  |
| C | 0.46865800  | 0.70336600  | 1.36220900  |
| C | -0.83750200 | -0.69271400 | -1.13518200 |

|   |             |             |             |
|---|-------------|-------------|-------------|
| H | -0.50395800 | -1.35387300 | -1.92345500 |
| C | -0.83775200 | 0.69309200  | -1.13507700 |
| H | -0.50378800 | 1.35464800  | -1.92282400 |
| C | -1.88894900 | 1.13419100  | -0.18714300 |
| C | -1.88867900 | -1.13420300 | -0.18726500 |
| O | -2.39204300 | -0.00014100 | 0.43314500  |
| O | -2.28175200 | -2.22937900 | 0.07931800  |
| O | -2.28252200 | 2.22917400  | 0.07944400  |
| S | 3.45716200  | 0.00018500  | -0.20715300 |
| H | 3.35320500  | -0.00091300 | 1.13312900  |
| H | 1.14035000  | 2.19248300  | -0.11315800 |
| H | 0.04901600  | 1.33081000  | 2.13971400  |
| H | 0.04904900  | -1.33256500 | 2.13843600  |
| H | 1.14077200  | -2.19200800 | -0.11488500 |
| H | 1.59088900  | 0.00096600  | -1.62244100 |

C<sub>5</sub>-SiH<sub>3</sub>-Anti-MA

|    |             |             |             |
|----|-------------|-------------|-------------|
| C  | -1.62540800 | 0.00002400  | -0.60395200 |
| C  | -0.91554700 | 1.14454500  | 0.04874600  |
| C  | -0.47860500 | 0.69520500  | 1.31074700  |
| C  | -0.91554800 | -1.14452300 | 0.04870600  |
| C  | -0.47861200 | -0.69522700 | 1.31072600  |
| C  | 0.86677300  | 0.69655600  | -1.11502100 |
| H  | 0.57983400  | 1.34709200  | -1.93002200 |
| C  | 0.86676200  | -0.69651900 | -1.11504200 |
| H  | 0.57980300  | -1.34701400 | -1.93006800 |
| C  | 1.91631600  | -1.13352700 | -0.16415500 |
| C  | 1.91635900  | 1.13350500  | -0.16414200 |
| O  | 2.42105600  | -0.00002400 | 0.45604500  |
| O  | 2.30642600  | 2.22890000  | 0.10943400  |
| O  | 2.30632400  | -2.22894200 | 0.10942400  |
| Si | -3.46814300 | 0.00001100  | -0.07728900 |
| H  | -4.11723200 | 1.20442400  | -0.64766600 |
| H  | -4.11715700 | -1.20464500 | -0.64724600 |
| H  | -3.58713800 | 0.00026000  | 1.39520300  |
| H  | -1.10399000 | 2.18625900  | -0.19078300 |
| H  | -0.07623000 | 1.33035000  | 2.09096600  |
| H  | -0.07625100 | -1.33040700 | 2.09092200  |
| H  | -1.10399800 | -2.18623200 | -0.19084300 |
| H  | -1.60903200 | 0.00004200  | -1.69732000 |

Tetracyanoethylene (TCNE)

|   |             |             |            |
|---|-------------|-------------|------------|
| C | 0.00003200  | 0.67880600  | 0.00000000 |
| C | -0.00003200 | -0.67880600 | 0.00000000 |
| C | 1.22612000  | -1.42366000 | 0.00000000 |
| C | -1.22615200 | -1.42369300 | 0.00000000 |

|   |             |             |            |
|---|-------------|-------------|------------|
| C | -1.22612000 | 1.42366000  | 0.00000000 |
| C | 1.22615200  | 1.42369300  | 0.00000000 |
| N | 2.20898900  | -2.03234700 | 0.00000000 |
| N | -2.20898900 | -2.03243300 | 0.00000000 |
| N | -2.20898900 | 2.03234700  | 0.00000000 |
| N | 2.20898900  | 2.03243300  | 0.00000000 |

C<sub>5</sub>-Br-Syn-TCNE

|    |             |             |             |
|----|-------------|-------------|-------------|
| C  | -0.82976100 | 1.41367000  | -0.01222700 |
| C  | 0.12654200  | 1.39444000  | -1.17009100 |
| H  | -0.19041400 | 1.30445300  | -2.20369400 |
| C  | 1.27471400  | 2.05200600  | -0.71780600 |
| H  | 2.09012500  | 2.38628300  | -1.34782900 |
| C  | 0.12550100  | 1.41566800  | 1.14646500  |
| H  | -0.19139300 | 1.34151700  | 2.18133500  |
| C  | 1.27427300  | 2.06436700  | 0.68349700  |
| H  | 2.08936100  | 2.40958600  | 1.30800000  |
| C  | 0.86529800  | -0.69902000 | -0.70559800 |
| C  | 0.86479900  | -0.68787900 | 0.71706800  |
| H  | -1.28551400 | 2.41197400  | -0.02179400 |
| Br | -2.33149900 | 0.21961300  | -0.00195400 |
| C  | 2.13424100  | -0.55156100 | 1.39167600  |
| C  | 2.13577600  | -0.57493900 | -1.38121800 |
| C  | -0.10463800 | -1.44134700 | 1.47285600  |
| C  | -0.10364900 | -1.46504700 | -1.44949000 |
| N  | -0.82689300 | -2.05181900 | 2.13855800  |
| N  | -0.82578100 | -2.08665600 | -2.10491700 |
| N  | 3.14751500  | -0.41880800 | 1.93322900  |
| N  | 3.14968800  | -0.45163700 | -1.92378400 |

C<sub>5</sub>-Cl-Syn-TCNE

|    |             |             |             |
|----|-------------|-------------|-------------|
| C  | -1.09214500 | -1.48453100 | -0.31940000 |
| C  | -0.13661900 | -1.65232400 | 0.83058200  |
| H  | -0.45764600 | -1.81010400 | 1.85480900  |
| C  | 1.05433700  | -2.11136400 | 0.26372700  |
| H  | 1.89221800  | -2.51797300 | 0.81722600  |
| C  | -0.13624200 | -1.16598900 | -1.43660400 |
| H  | -0.45616000 | -0.88884300 | -2.43544400 |
| C  | 1.05462800  | -1.81680600 | -1.10768800 |
| H  | 1.89265500  | -1.95943100 | -1.77925400 |
| C  | 0.43796400  | 0.54675300  | 0.84445800  |
| C  | 0.43727600  | 0.84706500  | -0.54419600 |
| H  | -1.45978100 | -2.49719200 | -0.53676600 |
| Cl | -2.54630200 | -0.50250800 | -0.10878700 |
| C  | 1.71018500  | 0.96027000  | -1.21611500 |
| C  | 1.71213900  | 0.37124700  | 1.50051300  |

|   |             |            |             |
|---|-------------|------------|-------------|
| C | -0.59736400 | 1.04487400 | 1.71464600  |
| C | -0.59983700 | 1.65824500 | -1.13027800 |
| N | -1.38862500 | 2.32661700 | -1.64846800 |
| N | -1.38341000 | 1.44120400 | 2.46463900  |
| N | 2.72757400  | 1.02937100 | -1.76177800 |
| N | 2.73159100  | 0.20731400 | 2.02145500  |

#### C<sub>5</sub>-F-Syn-TCNE

|   |             |             |             |
|---|-------------|-------------|-------------|
| C | 0.79146100  | -0.00165500 | 1.77916800  |
| C | -0.12368100 | -1.16428600 | 1.49866400  |
| H | 0.20026800  | -2.19937500 | 1.51449500  |
| C | -1.41336200 | -0.70605800 | 1.74174100  |
| H | -2.29706800 | -1.32920700 | 1.80829700  |
| C | -0.12360500 | 1.16147400  | 1.50039800  |
| H | 0.20029400  | 2.19655100  | 1.51823000  |
| C | -1.41331300 | 0.70290000  | 1.74285300  |
| H | -2.29698000 | 1.32599100  | 1.81051600  |
| C | -0.00654400 | -0.70728000 | -0.72681900 |
| C | -0.00637800 | 0.70862700  | -0.72534500 |
| H | 1.00164100  | -0.00241900 | 2.86052200  |
| F | 1.98338600  | -0.00124700 | 1.12158800  |
| C | -1.21899300 | 1.39874500  | -1.09107100 |
| C | -1.21945800 | -1.39634100 | -1.09355300 |
| C | 1.20570300  | 1.44701000  | -0.97488600 |
| C | 1.20522000  | -1.44550100 | -0.97764500 |
| N | 2.14645700  | 2.08590400  | -1.18384500 |
| N | 2.14578600  | -2.08430900 | -1.18772200 |
| N | -2.19725100 | 1.95447400  | -1.35882700 |
| N | -2.19798300 | -1.95123000 | -1.36209100 |

#### C<sub>5</sub>-Me-Syn-TCNE

|   |             |             |             |
|---|-------------|-------------|-------------|
| C | -1.18346300 | 0.00084200  | 1.60481400  |
| C | -0.21808500 | 1.15130500  | 1.48833100  |
| H | -0.52560200 | 2.19227300  | 1.45152500  |
| C | 1.02715600  | 0.70001600  | 1.94190900  |
| H | 1.88587200  | 1.32949000  | 2.14220300  |
| C | -0.21786700 | -1.14954000 | 1.48922100  |
| H | -0.52489600 | -2.19067600 | 1.45316100  |
| C | 1.02726700  | -0.69756000 | 1.94255400  |
| H | 1.88595500  | -1.32670300 | 2.14396000  |
| C | 0.21483800  | 0.71000800  | -0.70670900 |
| C | 0.21487600  | -0.71072600 | -0.70575900 |
| H | -1.40117400 | 0.00109800  | 2.68995900  |
| C | -2.54011100 | 0.00041400  | 0.91370200  |
| H | -3.10340400 | -0.88510400 | 1.22136300  |
| H | -3.10351600 | 0.88619800  | 1.22032100  |

|   |             |             |             |
|---|-------------|-------------|-------------|
| H | -2.49743000 | -0.00040500 | -0.17179100 |
| C | 1.48133100  | -1.39581900 | -0.79004900 |
| C | 1.48126600  | 1.39498400  | -0.79165800 |
| C | -0.88803900 | -1.45495700 | -1.25672400 |
| C | -0.88813100 | 1.45354600  | -1.25858900 |
| N | -1.75802900 | -2.08673400 | -1.68441300 |
| N | -1.75809700 | 2.08478000  | -1.68714800 |
| N | 2.49502900  | -1.95062600 | -0.84022500 |
| N | 2.49509200  | 1.94954500  | -0.84206400 |

C<sub>5</sub>-NH<sub>2</sub>-Syn-TCNE

|   |             |             |             |
|---|-------------|-------------|-------------|
| C | 0.96284500  | 0.00070000  | 1.71975100  |
| C | 0.01258300  | -1.15235400 | 1.51286900  |
| H | 0.32426400  | -2.19265300 | 1.50923300  |
| C | -1.26550100 | -0.69957600 | 1.83993500  |
| H | -2.14000500 | -1.32770600 | 1.96024100  |
| C | 0.01326400  | 1.15406600  | 1.51208900  |
| H | 0.32552100  | 2.19418200  | 1.50699600  |
| C | -1.26510900 | 0.70227400  | 1.83936700  |
| H | -2.13933800 | 1.33097700  | 1.95865200  |
| C | -0.07673500 | -0.70873200 | -0.71675500 |
| C | -0.07658600 | 0.70781100  | -0.71776200 |
| H | 1.13839500  | 0.00084800  | 2.81639500  |
| N | 2.17001200  | 0.00013000  | 0.93862500  |
| H | 2.73542900  | 0.82552700  | 1.12031600  |
| H | 2.73659800  | -0.82379300 | 1.12330700  |
| C | -1.32429500 | -1.38791800 | -0.97496500 |
| C | -1.32390900 | 1.38706300  | -0.97670600 |
| C | 1.08741000  | 1.47396500  | -1.08772500 |
| C | 1.08697600  | -1.47553400 | -1.08607400 |
| N | -2.32530000 | -1.93754500 | -1.15877400 |
| N | -2.32466100 | 1.93695900  | -1.16110900 |
| N | 1.95625400  | -2.17472600 | -1.39266400 |
| N | 1.95704900  | 2.17261700  | -1.39454800 |

C<sub>5</sub>-OH-Syn-TCNE

|   |             |             |             |
|---|-------------|-------------|-------------|
| C | 0.92224900  | -0.24132200 | 1.70817600  |
| C | -0.00367900 | -1.36891100 | 1.30067900  |
| H | 0.32227900  | -2.39263200 | 1.14046300  |
| C | -1.28660000 | -0.98999000 | 1.68650400  |
| H | -2.15280700 | -1.64041600 | 1.70609500  |
| C | -0.03763500 | 0.91625000  | 1.67822200  |
| H | 0.27279000  | 1.94431400  | 1.83259300  |
| C | -1.30835400 | 0.39841600  | 1.90785000  |
| H | -2.19525700 | 0.98354600  | 2.11880500  |
| C | -0.03752000 | -0.58501500 | -0.82482500 |

|   |             |             |             |
|---|-------------|-------------|-------------|
| C | -0.08996500 | 0.81428200  | -0.61840100 |
| H | 1.12510600  | -0.41753600 | 2.78268700  |
| O | 2.09949400  | -0.00430900 | 1.00994100  |
| H | 2.62681600  | -0.81575800 | 0.94786000  |
| C | -1.36033500 | 1.47559700  | -0.79104500 |
| C | -1.23745700 | -1.27552000 | -1.22939100 |
| C | 1.18596000  | -1.23800500 | -1.21552200 |
| C | 1.05641000  | 1.65362800  | -0.85689000 |
| N | -2.38458600 | 2.00039500  | -0.90662400 |
| N | -2.19973200 | -1.84075500 | -1.53311000 |
| N | 1.92803000  | 2.38321500  | -1.06914000 |
| N | 2.14009900  | -1.82621200 | -1.50258000 |

C<sub>5</sub>-SH-Syn-TCNE

|   |             |             |             |
|---|-------------|-------------|-------------|
| C | -1.12687600 | -0.40348000 | 1.42692800  |
| C | -0.12886700 | 0.70085800  | 1.68276200  |
| H | -0.41407500 | 1.72147200  | 1.91938400  |
| C | 1.04347800  | 0.07346300  | 2.12378400  |
| H | 1.89074000  | 0.57833200  | 2.57215900  |
| C | -0.19223700 | -1.52502100 | 1.07425900  |
| H | -0.52806600 | -2.49490800 | 0.72197300  |
| C | 1.01041800  | -1.27115800 | 1.73899100  |
| H | 1.83032000  | -1.97287500 | 1.83138600  |
| C | 0.47184000  | 0.87716900  | -0.45516200 |
| C | 0.45312400  | -0.47894000 | -0.88310000 |
| H | -1.48994800 | -0.67470400 | 2.43068300  |
| S | -2.59777700 | -0.17775000 | 0.38766100  |
| C | 1.71358400  | -1.16569600 | -1.02381700 |
| C | 1.76000400  | 1.49371500  | -0.22961900 |
| C | -0.58134000 | -0.98629100 | -1.74617900 |
| C | -0.52950600 | 1.81959100  | -0.89515800 |
| N | -1.37182100 | -1.45435000 | -2.44983200 |
| N | -1.26561900 | 2.64553700  | -1.23184900 |
| N | 2.72211800  | -1.72462200 | -1.11702700 |
| N | 2.78582500  | 1.98758600  | -0.02697900 |
| H | -3.17978700 | 0.70236200  | 1.21951600  |

C<sub>5</sub>-SiH<sub>3</sub>-Syn-TCNE

|   |             |             |             |
|---|-------------|-------------|-------------|
| C | 1.17845200  | 0.00054100  | -1.30828100 |
| C | 0.20976900  | 1.14713000  | -1.38113300 |
| H | 0.50545600  | 2.18921400  | -1.30153100 |
| C | -0.94233800 | 0.69675200  | -2.04943500 |
| H | -1.75703000 | 1.33001600  | -2.37950600 |
| C | 0.20962500  | -1.14584900 | -1.38222300 |
| H | 0.50513100  | -2.18806000 | -1.30364200 |
| C | -0.94242200 | -0.69463700 | -2.05011700 |

|    |             |             |             |
|----|-------------|-------------|-------------|
| H  | -1.75719400 | -1.32745400 | -2.38084600 |
| C  | -0.58992500 | 0.71273400  | 0.66702800  |
| C  | -0.59020200 | -0.71332400 | 0.66624500  |
| H  | 1.61302900  | 0.00099200  | -2.32929700 |
| Si | 2.84929700  | 0.00011000  | -0.35871400 |
| H  | 2.82107100  | -0.00178000 | 1.10691300  |
| H  | 3.53444700  | -1.20971800 | -0.87021800 |
| H  | 3.53354100  | 1.21172500  | -0.86718800 |
| C  | 0.42358200  | -1.45405800 | 1.36988600  |
| C  | 0.42438400  | 1.45219000  | 1.37129200  |
| C  | -1.85635200 | 1.39625900  | 0.57085400  |
| C  | -1.85692400 | -1.39617900 | 0.56920300  |
| N  | 1.23220400  | -2.09328700 | 1.89630400  |
| N  | 1.23350900  | 2.09036200  | 1.89822400  |
| N  | -2.86858900 | -1.94716200 | 0.46497600  |
| N  | -2.86776600 | 1.94782400  | 0.46726700  |

#### C<sub>5</sub>-Br-Anti-TCNE

|    |             |             |             |
|----|-------------|-------------|-------------|
| C  | -1.01792700 | 0.18705500  | -0.00011600 |
| H  | -0.86346800 | 1.26413500  | -0.00035500 |
| C  | -0.44133800 | -0.58138500 | 1.15559900  |
| H  | -0.60230200 | -0.29581200 | 2.18938000  |
| C  | -0.13427200 | -1.86429100 | 0.70053600  |
| H  | 0.17420500  | -2.69054200 | 1.32918800  |
| C  | -0.44177200 | -0.58151600 | -1.15592000 |
| H  | -0.60212400 | -0.29530100 | -2.18961200 |
| C  | -0.13453400 | -1.86439600 | -0.70082100 |
| H  | 0.17457100  | -2.69046800 | -1.32940200 |
| C  | 1.54702800  | 0.37584000  | 0.71284300  |
| C  | 1.54768000  | 0.37513500  | -0.71285400 |
| Br | -2.96644300 | -0.03541400 | 0.00018400  |
| C  | 2.38882800  | -0.56430400 | -1.40820400 |
| C  | 2.38818100  | -0.56254700 | 1.40986700  |
| C  | 1.25509800  | 1.59981900  | 1.41293200  |
| C  | 1.25603100  | 1.59829800  | -1.41457500 |
| N  | 0.97743700  | 2.56908800  | -1.97893300 |
| N  | 0.97638000  | 2.57142600  | 1.97581000  |
| N  | 3.04242000  | -1.34010800 | -1.96386700 |
| N  | 3.04185000  | -1.33737300 | 1.96679500  |

#### C<sub>5</sub>-Cl-Anti-TCNE

|   |             |             |            |
|---|-------------|-------------|------------|
| C | -1.51385500 | 0.12926400  | 0.00011800 |
| H | -1.35871600 | 1.20731600  | 0.00005400 |
| C | -0.90533800 | -0.62463000 | 1.15769100 |
| H | -1.07131500 | -0.34391900 | 2.19209400 |
| C | -0.56402400 | -1.89500000 | 0.70249300 |

|    |             |             |             |
|----|-------------|-------------|-------------|
| H  | -0.23119100 | -2.71325900 | 1.32947100  |
| C  | -0.90571800 | -0.62453700 | -1.15769500 |
| H  | -1.07199800 | -0.34361400 | -2.19199400 |
| C  | -0.56428300 | -1.89494600 | -0.70279100 |
| H  | -0.23144900 | -2.71305600 | -1.32996500 |
| C  | 1.05834100  | 0.39798300  | 0.71188000  |
| C  | 1.05845200  | 0.39769400  | -0.71208400 |
| Cl | -3.30185900 | -0.09485100 | 0.00039400  |
| C  | 1.92358300  | -0.51975400 | -1.40760200 |
| C  | 1.92363900  | -0.51877600 | 1.40815100  |
| C  | 0.72871400  | 1.61024400  | 1.41534500  |
| C  | 0.72901000  | 1.60959500  | -1.41624300 |
| N  | 0.42227000  | 2.57050300  | -1.98289900 |
| N  | 0.42177300  | 2.57163700  | 1.98106600  |
| N  | 2.59827000  | -1.27795200 | -1.96228700 |
| N  | 2.59842100  | -1.27616100 | 1.96384300  |

#### C<sub>5</sub>-F-Anti-TCNE

|   |             |             |             |
|---|-------------|-------------|-------------|
| C | 1.80404300  | -0.00846400 | 0.00031800  |
| H | 1.69555600  | -1.09479800 | 0.00003600  |
| C | 1.14356500  | 0.71481700  | 1.16415400  |
| H | 1.31590900  | 0.44733600  | 2.20103400  |
| C | 0.74046400  | 1.95694400  | 0.70850400  |
| H | 0.36797700  | 2.76292000  | 1.32987800  |
| C | 1.14418900  | 0.71521300  | -1.16362600 |
| H | 1.31648800  | 0.44765200  | -2.20049100 |
| C | 0.74075700  | 1.95714600  | -0.70786500 |
| H | 0.36862000  | 2.76329700  | -1.32921600 |
| C | -0.77072700 | -0.45079900 | 0.70856300  |
| C | -0.77054200 | -0.45042000 | -0.70903100 |
| F | 3.15364800  | 0.27227300  | 0.00082500  |
| C | -1.67690400 | 0.42348900  | -1.40744600 |
| C | -1.67710100 | 0.42290400  | 1.40726000  |
| C | -0.35375200 | -1.63032400 | -1.42054300 |
| C | -0.35449000 | -1.63123900 | 1.41957400  |
| N | 0.01407200  | -2.56513200 | -1.99438700 |
| N | 0.01272800  | -2.56650000 | 1.99306500  |
| N | -2.38949000 | 1.14451900  | 1.96366600  |
| N | -2.38936600 | 1.14533300  | -1.96346400 |

#### C<sub>5</sub>-Me-Anti-TCNE

|   |            |             |            |
|---|------------|-------------|------------|
| C | 1.80462200 | -0.01028100 | 0.00005900 |
| H | 1.67801400 | -1.09625800 | 0.00015700 |
| C | 1.12129700 | 0.68595000  | 1.14789100 |
| H | 1.28981100 | 0.42597300  | 2.18869500 |
| C | 0.69272700 | 1.93918700  | 0.69984100 |



|   |             |             |             |
|---|-------------|-------------|-------------|
| H | 0.30090400  | 2.72888400  | 1.32982900  |
| C | 1.12121700  | 0.68581400  | -1.14781200 |
| H | 1.28988600  | 0.42591900  | -2.18861300 |
| C | 0.69266600  | 1.93910300  | -0.69983900 |
| H | 0.30078400  | 2.72872700  | -1.32988100 |
| C | -0.77735100 | -0.42737000 | 0.71250100  |
| C | -0.77742500 | -0.42741900 | -0.71238700 |
| C | 3.32258000  | 0.28238000  | -0.00007200 |
| H | 3.78564200  | -0.16004500 | 0.88509100  |
| H | 3.78563500  | -0.16086600 | -0.88482300 |
| H | 3.51357900  | 1.35789400  | -0.00057400 |
| C | -1.70228900 | 0.42779600  | -1.41079100 |
| C | -1.70231800 | 0.42781900  | 1.41077800  |
| C | -0.37860000 | -1.61973500 | -1.41417200 |
| C | -0.37864400 | -1.61974100 | 1.41424000  |
| N | -2.42334400 | 1.13663000  | -1.97274900 |
| N | -2.42341300 | 1.13675700  | 1.97255500  |
| N | -0.01765300 | -2.56175000 | -1.98098900 |
| N | -0.01775200 | -2.56181300 | 1.98099700  |

#### C<sub>5</sub>-NH<sub>2</sub>-Anti-TCNE

|   |             |             |             |
|---|-------------|-------------|-------------|
| C | -1.82014200 | 0.01520900  | -0.02611300 |
| H | -1.68419900 | -1.06877700 | -0.03962900 |
| C | -1.11319300 | 0.72671500  | -1.16288800 |
| H | -1.28632800 | 0.47434900  | -2.20376100 |
| C | -0.67590100 | 1.96008700  | -0.69335200 |
| H | -0.26588000 | 2.75452300  | -1.30600700 |
| C | -1.13476300 | 0.70191600  | 1.14815800  |
| H | -1.31238400 | 0.43040600  | 2.18468900  |
| C | -0.69060000 | 1.94676000  | 0.71618100  |
| H | -0.29963000 | 2.73200600  | 1.35261600  |
| C | 0.78133500  | -0.43464200 | -0.70929600 |
| C | 0.76388900  | -0.45507300 | 0.71131000  |
| N | -3.26089500 | 0.25495800  | -0.11945800 |
| H | -3.73590600 | -0.23228000 | 0.63657900  |
| H | -3.45723000 | 1.24832500  | -0.01296000 |
| C | 1.68116300  | 0.38499600  | 1.43660400  |
| C | 1.71707300  | 0.42928500  | -1.38166400 |
| C | 0.32483200  | -1.64232600 | 1.39672400  |
| C | 0.37450800  | -1.60842400 | -1.43670800 |
| N | 2.39968500  | 1.07912600  | 2.01983100  |
| N | 2.45089400  | 1.14498300  | -1.91767500 |
| N | -0.06617800 | -2.57890500 | 1.95243200  |
| N | 0.01825600  | -2.54095900 | -2.02159500 |

#### C<sub>5</sub>-OH-Anti-TCNE

|   |            |             |             |
|---|------------|-------------|-------------|
| C | 1.82228500 | -0.03467600 | -0.00006000 |
|---|------------|-------------|-------------|

|   |             |             |             |
|---|-------------|-------------|-------------|
| H | 1.67859600  | -1.11621600 | 0.00001600  |
| C | 1.14844700  | 0.68821300  | 1.16069700  |
| H | 1.31649200  | 0.41908700  | 2.19840800  |
| C | 0.75003900  | 1.93691300  | 0.70743200  |
| H | 0.37763200  | 2.74315100  | 1.32879100  |
| C | 1.14856800  | 0.68802000  | -1.16101300 |
| H | 1.31674500  | 0.41873200  | -2.19865600 |
| C | 0.75008800  | 1.93680100  | -0.70795500 |
| H | 0.37765500  | 2.74292300  | -1.32944900 |
| C | -0.77776200 | -0.43415500 | 0.70936600  |
| C | -0.77785900 | -0.43434000 | -0.70930600 |
| O | 3.22090400  | 0.14609300  | -0.00003500 |
| H | 3.40396400  | 1.09873300  | -0.00015800 |
| C | -0.38376100 | -1.62302600 | -1.41932200 |
| C | -0.38357500 | -1.62266800 | 1.41961200  |
| C | -1.67739700 | 0.44750200  | -1.40738300 |
| C | -1.67720600 | 0.44779600  | 1.40739000  |
| N | -0.03802800 | -2.56543600 | -1.99442500 |
| N | -0.03771700 | -2.56488300 | 1.99496100  |
| N | -2.38295200 | 1.17547600  | -1.96431200 |
| N | -2.38266200 | 1.17577900  | 1.96443100  |

#### C<sub>5</sub>-SH-Anti-TCNE

|   |             |             |             |
|---|-------------|-------------|-------------|
| C | -1.52393700 | 0.11724900  | -0.00011400 |
| H | -1.36905700 | 1.19880700  | -0.00046800 |
| C | -0.89382800 | -0.61545700 | 1.15296900  |
| H | -1.06181100 | -0.33828200 | 2.18833300  |
| C | -0.53516400 | -1.88938700 | 0.70090400  |
| H | -0.18534400 | -2.69894300 | 1.33012100  |
| C | -0.89390700 | -0.61613600 | -1.15276700 |
| H | -1.06089800 | -0.33926200 | -2.18836700 |
| C | -0.53517400 | -1.88977900 | -0.69998800 |
| H | -0.18490300 | -2.69951100 | -1.32872700 |
| C | 1.05794300  | 0.39069700  | 0.71352300  |
| C | 1.05792800  | 0.39044500  | -0.71373200 |
| H | -3.38340500 | -1.37559700 | -0.00012900 |
| S | -3.35867400 | -0.03130500 | 0.00014000  |
| C | 1.93658900  | -0.51423300 | -1.40908600 |
| C | 1.93705300  | -0.51339400 | 1.40924100  |
| C | 0.73002000  | 1.60634500  | -1.41205200 |
| C | 0.72986200  | 1.60675700  | 1.41138500  |
| N | 2.62023000  | -1.26307400 | -1.96574800 |
| N | 2.62095800  | -1.26174200 | 1.96624600  |
| N | 0.42098200  | 2.57029800  | -1.97243600 |
| N | 0.42067300  | 2.57095000  | 1.97126800  |

C<sub>5</sub>-SiH<sub>3</sub>-Anti-TCNE

|    |             |             |             |
|----|-------------|-------------|-------------|
| C  | -1.49615800 | 0.20219000  | 0.00008500  |
| H  | -1.35965000 | 1.28865100  | 0.00011600  |
| C  | -0.88275700 | -0.53346500 | 1.13963600  |
| H  | -1.02877100 | -0.26062800 | 2.18078200  |
| C  | -0.58596800 | -1.84512400 | 0.69157400  |
| H  | -0.27488600 | -2.66397000 | 1.32856900  |
| C  | -0.88271800 | -0.53333700 | -1.13954800 |
| H  | -1.02875400 | -0.26038000 | -2.18066200 |
| C  | -0.58596600 | -1.84505700 | -0.69161300 |
| H  | -0.27487900 | -2.66384100 | -1.32868600 |
| C  | 1.06434800  | 0.34347000  | 0.71847900  |
| C  | 1.06419300  | 0.34357700  | -0.71844800 |
| Si | -3.40291400 | -0.08004800 | -0.00005900 |
| H  | -3.95676200 | 0.55972800  | 1.21226500  |
| H  | -3.95650600 | 0.55992100  | -1.21240500 |
| H  | -3.67461500 | -1.53236400 | -0.00026000 |
| C  | 0.81507600  | 1.58700600  | -1.40347200 |
| C  | 0.81524600  | 1.58673000  | 1.40379900  |
| C  | 1.92833800  | -0.57919100 | 1.41109300  |
| C  | 1.92820600  | -0.57884700 | -1.41137100 |
| N  | 2.59125800  | -1.34234800 | -1.97293900 |
| N  | 2.59141900  | -1.34290400 | 1.97234100  |
| N  | 0.55907100  | 2.57140800  | 1.95483600  |
| N  | 0.55890700  | 2.57182100  | -1.95426400 |

1,2,4-triazoline-3,5-dione (TAD)

|   |             |             |             |
|---|-------------|-------------|-------------|
| N | -0.00967900 | -0.94432900 | 0.00000000  |
| N | 0.00860500  | 1.25738700  | -0.61640800 |
| N | 0.00860500  | 1.25738700  | 0.61640800  |
| C | -0.00152900 | -0.15232900 | -1.12830600 |
| C | -0.00152900 | -0.15232900 | 1.12830600  |
| O | -0.00152900 | -0.45070200 | 2.27966800  |
| O | -0.00152900 | -0.45070200 | -2.27966800 |
| H | -0.00991400 | -1.95393300 | 0.00000000  |

C<sub>5</sub>-Br-Syn-TAD

|   |             |             |             |
|---|-------------|-------------|-------------|
| C | -1.27369000 | 0.00050100  | -0.97371800 |
| C | -0.32753900 | -1.15823600 | -1.12732300 |
| H | -0.60766600 | -2.18831500 | -0.94774300 |
| C | 0.73055900  | -0.70789800 | -1.89988500 |
| H | 1.49836400  | -1.33855800 | -2.33227300 |
| C | -0.32741900 | 1.15925300  | -1.12600500 |
| H | -0.60727700 | 2.18926600  | -0.94565000 |
| C | 0.73069000  | 0.70930900  | -1.89914600 |
| H | 1.49862400  | 1.34027900  | -2.33084200 |

|    |             |             |             |
|----|-------------|-------------|-------------|
| N  | 2.70055100  | -0.00049200 | 0.51448300  |
| N  | 0.54566600  | 0.64387900  | 0.78397600  |
| N  | 0.54541500  | -0.64411300 | 0.78379200  |
| C  | 1.91327400  | 1.13373700  | 0.60706300  |
| C  | 1.91277200  | -1.13444900 | 0.60653800  |
| O  | 2.24962700  | -2.28323200 | 0.60059000  |
| O  | 2.25057900  | 2.28239100  | 0.60180500  |
| H  | 3.70808900  | -0.00069000 | 0.45653400  |
| H  | -1.92497400 | 0.00115200  | -1.85602800 |
| Br | -2.46457500 | -0.00013200 | 0.53245500  |

#### C<sub>5</sub>-Cl-Syn-TAD

|    |             |             |             |
|----|-------------|-------------|-------------|
| C  | 1.84364300  | -0.00067100 | 0.54883300  |
| C  | 0.93754200  | -1.16176000 | 0.86530500  |
| H  | 1.18120000  | -2.19188500 | 0.63899000  |
| C  | 0.03143600  | -0.71155900 | 1.80867700  |
| H  | -0.64796000 | -1.34131900 | 2.37072200  |
| C  | 0.93755100  | 1.15969600  | 0.86806400  |
| H  | 1.18107400  | 2.19031900  | 0.64386500  |
| C  | 0.03144800  | 0.70745000  | 1.81029600  |
| H  | -0.64789000 | 1.33598400  | 2.37377800  |
| N  | -2.32383800 | 0.00053700  | -0.22512300 |
| N  | -0.25075500 | 0.64342900  | -0.87738900 |
| N  | -0.25098000 | -0.64201500 | -0.87829800 |
| C  | -1.56628900 | 1.13449700  | -0.46009400 |
| C  | -1.56663300 | -1.13329500 | -0.46156200 |
| O  | -1.89712400 | -2.28195800 | -0.39942900 |
| O  | -1.89651500 | 2.28314800  | -0.39648500 |
| H  | -3.30510800 | 0.00052000  | 0.01103700  |
| H  | 2.62378700  | -0.00163500 | 1.32221400  |
| Cl | 2.69710700  | 0.00109900  | -1.00027900 |

#### C<sub>5</sub>-F-Syn-TAD

|   |             |             |             |
|---|-------------|-------------|-------------|
| C | -2.12131300 | -0.00004300 | -0.07104500 |
| C | -1.33377900 | 1.16337100  | 0.47578200  |
| H | -1.51090900 | 2.19423300  | 0.19704700  |
| C | -0.68707200 | 0.71147800  | 1.60724700  |
| H | -0.16777800 | 1.33636500  | 2.32419900  |
| C | -1.33394700 | -1.16376800 | 0.47521700  |
| H | -1.51120100 | -2.19448000 | 0.19603800  |
| C | -0.68715500 | -0.71246400 | 1.60690800  |
| H | -0.16786900 | -1.33774800 | 2.32352100  |
| N | 2.07581300  | 0.00022000  | 0.14692300  |
| N | 0.21518300  | -0.64164900 | -0.97862300 |
| N | 0.21497400  | 0.64173100  | -0.97846400 |
| C | 1.39849400  | -1.13331400 | -0.26590700 |

|   |             |             |             |
|---|-------------|-------------|-------------|
| C | 1.39813200  | 1.13363400  | -0.26568400 |
| O | 1.70705100  | 2.28204700  | -0.13231000 |
| O | 1.70777800  | -2.28165500 | -0.13275900 |
| H | 2.97829200  | 0.00031000  | 0.59863000  |
| H | -3.09597000 | -0.00008500 | 0.44521900  |
| F | -2.35390500 | 0.00031000  | -1.40756200 |

#### C<sub>5</sub>-Me-Syn-TAD

|   |             |             |             |
|---|-------------|-------------|-------------|
| C | 2.13209700  | 0.00000100  | 0.08205400  |
| C | 1.29367900  | -1.15064600 | 0.57504800  |
| H | 1.48713600  | -2.18779100 | 0.32672700  |
| C | 0.52676000  | -0.70632300 | 1.64268300  |
| H | -0.06815200 | -1.33836400 | 2.29151900  |
| C | 1.29363900  | 1.15060900  | 0.57507400  |
| H | 1.48707800  | 2.18776800  | 0.32679700  |
| C | 0.52674100  | 0.70623700  | 1.64270200  |
| H | -0.06818700 | 1.33824400  | 2.29155700  |
| N | -2.11522400 | 0.00001700  | 0.02546600  |
| N | -0.18112400 | 0.64482100  | -0.95406400 |
| N | -0.18114200 | -0.64480900 | -0.95408600 |
| C | -1.40321600 | 1.13443500  | -0.32454300 |
| C | -1.40324300 | -1.13441200 | -0.32457200 |
| O | -1.72185100 | -2.28321700 | -0.20523700 |
| O | -1.72179500 | 2.28324600  | -0.20518200 |
| H | -3.03747300 | 0.00002300  | 0.43480700  |
| H | 3.00360400  | 0.00001800  | 0.76222300  |
| C | 2.65146000  | 0.00002500  | -1.34663800 |
| H | 1.83537300  | -0.00022500 | -2.06731500 |
| H | 3.27213800  | 0.88456500  | -1.51757500 |
| H | 3.27257300  | -0.88423300 | -1.51744900 |

#### C<sub>5</sub>-NH<sub>2</sub>-Syn-TAD

|   |             |             |             |
|---|-------------|-------------|-------------|
| C | 2.14080000  | 0.01136900  | 0.00657200  |
| C | 1.34999000  | -1.14521100 | 0.55854300  |
| H | 1.55263300  | -2.17599200 | 0.29503500  |
| C | 0.60986200  | -0.69676100 | 1.63495800  |
| H | 0.05241800  | -1.32648900 | 2.31848300  |
| C | 1.29928700  | 1.16868600  | 0.52328600  |
| H | 1.47016200  | 2.20643900  | 0.26005200  |
| C | 0.59042400  | 0.72197600  | 1.62314500  |
| H | 0.02377000  | 1.34722100  | 2.30377600  |
| N | -2.09583100 | -0.00881600 | 0.09126800  |
| N | -0.20873500 | 0.64091100  | -0.97280200 |
| N | -0.20435900 | -0.64497400 | -0.97423700 |
| C | -1.41226800 | 1.12820900  | -0.29770800 |
| C | -1.39794900 | -1.14139400 | -0.29538000 |

|   |             |             |             |
|---|-------------|-------------|-------------|
| O | -1.70921600 | -2.29022000 | -0.16784900 |
| O | -1.73189200 | 2.27578400  | -0.17692500 |
| H | -3.00390700 | -0.01436500 | 0.53126800  |
| H | 3.04732700  | 0.04150300  | 0.63730400  |
| N | 2.56845400  | -0.10423600 | -1.36083300 |
| H | 1.75571700  | -0.12367700 | -1.97081600 |
| H | 3.13316200  | 0.69941400  | -1.62117500 |

C<sub>5</sub>-OH-Syn-TAD

|   |             |             |             |
|---|-------------|-------------|-------------|
| C | 2.13803700  | 0.01294900  | -0.06056900 |
| C | 1.36017500  | -1.10850000 | 0.59403400  |
| H | 1.54043500  | -2.15757400 | 0.39287100  |
| C | 0.67327000  | -0.58252500 | 1.66616100  |
| H | 0.14648900  | -1.15565900 | 2.42042500  |
| C | 1.33660700  | 1.20908700  | 0.41536100  |
| H | 1.51147600  | 2.22048200  | 0.06965600  |
| C | 0.66371300  | 0.83654700  | 1.56180300  |
| H | 0.13071300  | 1.50834900  | 2.22488300  |
| N | -2.07714900 | -0.03533000 | 0.14439000  |
| N | -0.23616400 | 0.61079000  | -1.00074200 |
| N | -0.21188300 | -0.67257900 | -0.96194500 |
| C | -1.42746900 | 1.10106000  | -0.30172300 |
| C | -1.37950500 | -1.16878400 | -0.23694500 |
| O | -1.66864500 | -2.31816200 | -0.07372100 |
| O | -1.76172400 | 2.24570600  | -0.20579800 |
| H | -2.97505400 | -0.04147500 | 0.60509900  |
| H | 3.08934200  | 0.07094200  | 0.49464700  |
| H | 1.65764600  | -0.24728000 | -1.89230000 |
| O | 2.47866300  | -0.09216400 | -1.39747100 |

C<sub>5</sub>-SH-Syn-TAD

|   |             |             |             |
|---|-------------|-------------|-------------|
| C | 1.82880600  | 0.14214600  | 0.55856300  |
| C | 0.95123200  | -0.95954900 | 1.09126900  |
| H | 1.21487100  | -2.00848700 | 1.03582200  |
| C | 0.00403300  | -0.38735600 | 1.92006800  |
| H | -0.67944600 | -0.93478300 | 2.55848700  |
| C | 0.88549300  | 1.31509100  | 0.68509400  |
| H | 1.10961100  | 2.30453400  | 0.30612700  |
| C | -0.02862600 | 1.00803300  | 1.68463000  |
| H | -0.73694400 | 1.70506000  | 2.11667500  |
| N | -2.31738300 | -0.12937300 | -0.25107000 |
| N | -0.26816700 | 0.55559700  | -0.92183300 |
| N | -0.20039800 | -0.72457800 | -0.78622300 |
| C | -1.61815400 | 1.01501100  | -0.58475700 |
| C | -1.49215200 | -1.23933300 | -0.34793900 |
| O | -1.76771300 | -2.39053600 | -0.16864300 |

|   |             |             |             |
|---|-------------|-------------|-------------|
| O | -2.01035900 | 2.14455500  | -0.64954200 |
| H | -3.30159100 | -0.16129600 | -0.03037100 |
| H | 2.60817000  | 0.29934100  | 1.31663800  |
| S | 2.65460800  | -0.17493100 | -1.02810000 |
| H | 3.85400800  | 0.28658700  | -0.63599600 |

C<sub>5</sub>-SiH<sub>3</sub>-Syn-TAD

|    |             |             |             |
|----|-------------|-------------|-------------|
| C  | -1.79208200 | -0.29885900 | -0.62515800 |
| C  | -0.80171000 | -1.43248500 | -0.56616000 |
| H  | -1.00468800 | -2.38903200 | -0.09909100 |
| C  | 0.16550200  | -1.22283500 | -1.55710200 |
| H  | 0.92697700  | -1.93995300 | -1.84026500 |
| C  | -0.92666900 | 0.74481600  | -1.27531900 |
| H  | -1.21274000 | 1.78522300  | -1.38037400 |
| C  | 0.09542100  | 0.11660300  | -1.97520300 |
| H  | 0.80020300  | 0.61120800  | -2.63340700 |
| N  | 2.29651500  | 0.26377400  | 0.30721100  |
| N  | 0.12792300  | 0.77971000  | 0.67525100  |
| N  | 0.26159400  | -0.48492600 | 0.93131900  |
| C  | 1.40456900  | 1.32668700  | 0.26134800  |
| C  | 1.64630400  | -0.88944100 | 0.69975200  |
| O  | 2.09731200  | -1.98519300 | 0.88018800  |
| O  | 1.63163700  | 2.47239000  | -0.00663200 |
| H  | 3.28603600  | 0.33544000  | 0.12257500  |
| Si | -2.75042800 | 0.23041200  | 0.93744100  |
| H  | -4.04831300 | -0.49438200 | 0.91250800  |
| H  | -2.05005600 | -0.09202000 | 2.19219300  |
| H  | -3.02894000 | 1.68015000  | 0.81907800  |
| H  | -2.54432300 | -0.59680300 | -1.37524600 |

C<sub>5</sub>-Br-Anti-TAD

|   |             |             |             |
|---|-------------|-------------|-------------|
| C | -1.07010900 | 0.00011700  | 0.54102700  |
| H | -1.01701900 | 0.00029700  | 1.62477000  |
| C | -0.39604100 | -1.15701100 | -0.14734200 |
| H | -0.54891600 | -2.18847100 | 0.14215500  |
| C | 0.09596000  | -0.70703400 | -1.36257500 |
| H | 0.52316200  | -1.33894600 | -2.13173300 |
| C | -0.39609700 | 1.15703600  | -0.14773000 |
| H | -0.54894600 | 2.18858100  | 0.14146900  |
| C | 0.09594200  | 0.70669700  | -1.36279000 |
| H | 0.52315200  | 1.33836200  | -2.13214800 |
| N | 3.02163100  | -0.00000300 | -0.28826500 |
| N | 1.31310900  | 0.64815600  | 1.04413300  |
| N | 1.31308000  | -0.64805800 | 1.04413200  |
| C | 2.39788200  | 1.13590700  | 0.19766500  |
| C | 2.39783700  | -1.13588400 | 0.19765700  |

|    |             |             |             |
|----|-------------|-------------|-------------|
| O  | 2.68977900  | -2.28390500 | 0.02361600  |
| O  | 2.68990300  | 2.28390700  | 0.02361300  |
| H  | 3.85895900  | -0.00001700 | -0.85196000 |
| Br | -2.97470900 | 0.00001600  | 0.07811800  |

C<sub>5</sub>-Cl-Anti-TAD

|    |             |             |             |
|----|-------------|-------------|-------------|
| C  | -1.62384600 | -0.00019000 | 0.54472200  |
| H  | -1.53358800 | -0.00047500 | 1.62696300  |
| C  | -0.94551300 | -1.15905900 | -0.14940200 |
| H  | -1.09472600 | -2.19103500 | 0.14052100  |
| C  | -0.45909300 | -0.70855700 | -1.36298100 |
| H  | -0.03265800 | -1.33812100 | -2.13472800 |
| C  | -0.94553600 | 1.15904500  | -0.14878200 |
| H  | -1.09485400 | 2.19081800  | 0.14172700  |
| C  | -0.45912600 | 0.70915800  | -1.36263500 |
| H  | -0.03268400 | 1.33913100  | -2.13403900 |
| N  | 2.47081200  | 0.00000100  | -0.29886300 |
| N  | 0.77058300  | 0.64701100  | 1.04594300  |
| N  | 0.77056600  | -0.64713800 | 1.04593100  |
| C  | 1.85292500  | 1.13565700  | 0.19480000  |
| C  | 1.85293700  | -1.13573500 | 0.19481800  |
| O  | 2.14577200  | -2.28354700 | 0.02301700  |
| O  | 2.14570700  | 2.28349200  | 0.02303900  |
| H  | 3.30870500  | 0.00000700  | -0.86180700 |
| Cl | -3.38660300 | -0.00005300 | 0.16697600  |

C<sub>5</sub>-F-Anti-TAD

|   |             |             |             |
|---|-------------|-------------|-------------|
| C | -1.94703100 | 0.00007700  | -0.58979400 |
| H | -1.81811200 | 0.00017100  | -1.67107200 |
| C | -1.28017300 | 1.16518100  | 0.12706500  |
| H | -1.41334300 | 2.19946300  | -0.16294600 |
| C | -0.82616400 | 0.71433100  | 1.34369300  |
| H | -0.42175000 | 1.33768900  | 2.13283100  |
| C | -1.28012700 | -1.16512300 | 0.12684700  |
| H | -1.41327800 | -2.19933200 | -0.16342500 |
| C | -0.82613400 | -0.71448700 | 1.34357200  |
| H | -0.42169000 | -1.33799700 | 2.13257100  |
| N | 2.12548700  | -0.00002700 | 0.35128800  |
| N | 0.47888400  | -0.64381600 | -1.06305700 |
| N | 0.47891400  | 0.64388200  | -1.06306700 |
| C | 1.53343500  | -1.13507300 | -0.17453100 |
| C | 1.53349400  | 1.13506200  | -0.17454100 |
| O | 1.82523600  | 2.28251600  | -0.00212600 |
| O | 1.82509000  | -2.28254700 | -0.00211500 |
| H | 2.94970100  | -0.00005100 | 0.93410500  |
| F | -3.29899300 | 0.00002500  | -0.30646200 |



C<sub>5</sub>-Me-Anti-TAD

|   |             |             |             |
|---|-------------|-------------|-------------|
| C | 1.95407600  | -0.00002900 | -0.57936600 |
| H | 1.81046000  | -0.00006500 | -1.66046500 |
| C | 1.25123900  | -1.14903500 | 0.10012800  |
| H | 1.38158100  | -2.18679600 | -0.18338600 |
| C | 0.76764200  | -0.70679200 | 1.32349500  |
| H | 0.34059100  | -1.33864600 | 2.09358200  |
| C | 1.25125900  | 1.14904000  | 0.10003900  |
| H | 1.38159500  | 2.18677600  | -0.18356400 |
| C | 0.76765300  | 0.70690200  | 1.32344000  |
| H | 0.34060900  | 1.33882200  | 2.09347800  |
| N | -2.17417500 | -0.00000100 | 0.32168800  |
| N | -0.49886800 | 0.64712700  | -1.05249300 |
| N | -0.49886900 | -0.64715500 | -1.05248100 |
| C | -1.55935700 | 1.13469700  | -0.17923600 |
| C | -1.55936700 | -1.13470600 | -0.17922500 |
| O | -1.84854000 | -2.28334300 | 0.00342200  |
| O | -1.84851500 | 2.28333800  | 0.00340800  |
| H | -2.99110000 | 0.00000600  | 0.91389100  |
| C | 3.46143200  | -0.00003500 | -0.25785800 |
| H | 3.93864100  | 0.88462100  | -0.68771000 |
| H | 3.63135100  | -0.00004600 | 0.82176300  |
| H | 3.93863800  | -0.88468500 | -0.68772700 |

C<sub>5</sub>-NH<sub>2</sub>-Anti-TAD

|   |             |             |             |
|---|-------------|-------------|-------------|
| C | -1.96785700 | -0.00347400 | -0.57699800 |
| H | -1.80794900 | -0.02481900 | -1.65480400 |
| C | -1.26451600 | 1.16349900  | 0.08891100  |
| H | -1.40877700 | 2.19086700  | -0.22063500 |
| C | -0.78395500 | 0.74375100  | 1.31436900  |
| H | -0.35614400 | 1.38822700  | 2.07367900  |
| C | -1.26628300 | -1.14951000 | 0.14143400  |
| H | -1.39233500 | -2.19321300 | -0.12263100 |
| C | -0.78554900 | -0.67909600 | 1.34734600  |
| H | -0.36360400 | -1.28752700 | 2.13919800  |
| N | -3.40900900 | 0.08478600  | -0.32933800 |
| H | -3.87370500 | -0.71093100 | -0.76070800 |
| H | -3.58746100 | 0.02567200  | 0.67180600  |
| N | 2.15552100  | -0.00783200 | 0.33467100  |
| N | 0.48986400  | -0.65492100 | -1.05335600 |
| N | 0.49357300  | 0.63550200  | -1.05967000 |
| C | 1.54711800  | -1.14301500 | -0.17329000 |
| C | 1.55511100  | 1.12650000  | -0.18340600 |
| O | 1.85091300  | 2.27435500  | -0.01314300 |
| O | 1.83632900  | -2.29122000 | 0.00793700  |

|   |            |             |            |
|---|------------|-------------|------------|
| H | 2.97798100 | -0.00803200 | 0.91940000 |
|---|------------|-------------|------------|

C<sub>5</sub>-OH-Anti-TAD

|   |             |             |             |
|---|-------------|-------------|-------------|
| C | 1.96589800  | 0.00002300  | -0.59430800 |
| H | 1.82121000  | 0.00005500  | -1.67268000 |
| C | 1.27465400  | -1.16235500 | 0.10999100  |
| H | 1.40777500  | -2.19706800 | -0.18024700 |
| C | 0.81237600  | -0.71454600 | 1.32835900  |
| H | 0.39971000  | -1.33786500 | 2.11350900  |
| C | 1.27471300  | 1.16239500  | 0.11003900  |
| H | 1.40774500  | 2.19710900  | -0.18022900 |
| C | 0.81239200  | 0.71455500  | 1.32837900  |
| H | 0.39971500  | 1.33785400  | 2.11353800  |
| H | 3.51137400  | 0.00004300  | 0.58154900  |
| N | -2.13917600 | -0.00001000 | 0.35129400  |
| N | -0.48983500 | 0.64388700  | -1.05991700 |
| N | -0.48980000 | -0.64387700 | -1.05990200 |
| C | -1.54398300 | 1.13479000  | -0.17157600 |
| C | -1.54394100 | -1.13481700 | -0.17156600 |
| O | -1.83517500 | -2.28250000 | 0.00281500  |
| O | -1.83524300 | 2.28247200  | 0.00280100  |
| H | -2.96139700 | -0.00001800 | 0.93667600  |
| O | 3.36203000  | -0.00001800 | -0.37666000 |

C<sub>5</sub>-SH-Anti-TAD

|   |             |             |             |
|---|-------------|-------------|-------------|
| C | -1.63566900 | -0.00010900 | -0.53849600 |
| H | -1.53877300 | -0.00036800 | -1.62364600 |
| C | -0.93773000 | 1.15442300  | 0.13304900  |
| H | -1.08688500 | 2.18700700  | -0.15577100 |
| C | -0.43959600 | 0.70776300  | 1.34949300  |
| H | -0.00199200 | 1.33924700  | 2.11351800  |
| C | -0.93737500 | -1.15416800 | 0.13349900  |
| H | -1.08660100 | -2.18684400 | -0.15492500 |
| C | -0.43946600 | -0.70695400 | 1.34981600  |
| H | -0.00153600 | -1.33806100 | 2.11396000  |
| N | 2.48871700  | -0.00000500 | 0.29163100  |
| N | 0.78006600  | -0.64830700 | -1.03988500 |
| N | 0.78011900  | 0.64804700  | -1.04011500 |
| C | 1.86379800  | -1.13562700 | -0.19401900 |
| C | 1.86375500  | 1.13552000  | -0.19421800 |
| O | 2.15645200  | 2.28375400  | -0.01912500 |
| O | 2.15660200  | -2.28382200 | -0.01887600 |
| H | 3.32462900  | 0.00004700  | 0.85716800  |
| S | -3.44544000 | -0.00026800 | -0.22965100 |
| H | -3.35484800 | 0.00056900  | 1.11195300  |

C<sub>5</sub>-SiH<sub>3</sub>-Anti-TAD

|    |             |             |             |
|----|-------------|-------------|-------------|
| C  | 1.60780600  | 0.00009000  | -0.59783200 |
| H  | 1.54780000  | 0.00018100  | -1.68812400 |
| C  | 0.90360800  | -1.14042500 | 0.05865300  |
| H  | 1.03289100  | -2.17823000 | -0.22492900 |
| C  | 0.43424400  | -0.69887200 | 1.30711700  |
| H  | 0.01320200  | -1.33867900 | 2.07318200  |
| C  | 0.90359100  | 1.14048300  | 0.05883500  |
| H  | 1.03279900  | 2.17834600  | -0.22457700 |
| C  | 0.43422800  | 0.69871000  | 1.30722400  |
| H  | 0.01314400  | 1.33837700  | 2.07338400  |
| N  | -2.51871500 | -0.00003000 | 0.29337600  |
| N  | -0.81228200 | 0.65238900  | -1.03492000 |
| N  | -0.81226200 | -0.65232400 | -1.03493700 |
| C  | -1.88135600 | 1.13532600  | -0.17771200 |
| C  | -1.88130600 | -1.13533800 | -0.17771900 |
| O  | -2.16307600 | -2.28451400 | 0.01866400  |
| O  | -2.16320600 | 2.28447900  | 0.01867700  |
| H  | -3.33071900 | -0.00005100 | 0.89234100  |
| Si | 3.45716000  | 0.00001900  | -0.10365500 |
| H  | 4.09531200  | 1.20735900  | -0.67685700 |
| H  | 3.58830400  | -0.00005700 | 1.36898000  |
| H  | 4.09521200  | -1.20730600 | -0.67699500 |

**Table S2 Energetic Data**

E- Electronic Energy

ZPE- Zero Point Energy

H- Enthalpy

qG- Corrected Gibbs Free Energy

| C <sub>5</sub> -X      | E            | ZPE          | H            | qG           |
|------------------------|--------------|--------------|--------------|--------------|
| Cyclopentadiene.out    | -194.004692  | -193.910661  | -193.905603  | -193.9916    |
| Br.out                 | -2765.184849 | -2765.100437 | -2765.094186 | -2767.5761   |
| Cl.out                 | -653.569647  | -653.484463  | -653.478395  | -653.5994    |
| F.out                  | -293.197241  | -293.110798  | -293.105029  | -293.2317    |
| Me.out                 | -233.298065  | -233.17513   | -233.168749  | -233.2687    |
| NH <sub>2</sub> .out   | -249.322657  | -249.210834  | -249.204573  | -249.3173    |
| OH.out                 | -269.183262  | -269.084431  | -269.078293  | -269.2003    |
| SH.out                 | -592.154788  | -592.061163  | -592.054479  | -592.1783    |
| SiH <sub>3</sub> .out  | -484.658123  | -484.549202  | -484.54177   | -484.6615    |
| Ethylene.out           | -78.536835   | -78.485078   | -78.481103   | -78.5334     |
| <b>TS-Syn-Ethylene</b> |              |              |              |              |
| Br.out                 | -2843.702952 | -2843.563276 | -2843.555104 | -2846.062532 |
| Cl.out                 | -732.088013  | -731.947638  | -731.939658  | -732.089086  |
| F.out                  | -371.723774  | -371.581965  | -371.574277  | -371.727502  |

|          |             |             |             |              |
|----------|-------------|-------------|-------------|--------------|
| Me.out   | -311.811424 | -311.63392  | -311.625536 | -311.754243  |
| NH2.out  | -327.841331 | -327.674244 | -327.66614  | -327.806961  |
| OH.out   | -347.704943 | -347.550745 | -347.542724 | -347.692118  |
| SH.out   | -670.668272 | -670.518862 | -670.5105   | -670.6623499 |
| SiH3.out | -563.160827 | -562.99624  | -562.987063 | -563.135228  |
| H.out    | -272.518792 | -272.369459 | -272.362497 | -272.4771    |

### **TS-Anti-Ethylene**

|          |              |              |              |              |
|----------|--------------|--------------|--------------|--------------|
| Br.out   | -2843.701045 | -2843.561267 | -2843.552901 | -2846.062348 |
| Cl.out   | -732.085421  | -731.944923  | -731.936773  | -732.085786  |
| F.out    | -371.713266  | -371.571633  | -371.563779  | -371.718677  |
| Me.out   | -311.811426  | -311.633416  | -311.625035  | -311.7527    |
| NH2.out  | -327.837147  | -327.67018   | -327.66192   | -327.802491  |
| OH.out   | -347.699392  | -347.545293  | -347.537203  | -347.686909  |
| SH.out   | -670.668986  | -670.519491  | -670.510976  | -670.662211  |
| SiH3.out | -563.169749  | -563.004526  | -562.995386  | -563.141871  |

### **Syn-Adducts**

|            |              |              |              |              |
|------------|--------------|--------------|--------------|--------------|
| Br-Syn.out | -2843.787983 | -2843.642995 | -2843.635593 | -2846.137347 |
| Cl-Syn.out | -732.173626  | -732.027855  | -732.020675  | -732.163489  |

|              |             |             |             |             |
|--------------|-------------|-------------|-------------|-------------|
| F-Syn.out    | -371.807673 | -371.660327 | -371.65344  | -371.800865 |
| Me-Syn.out   | -311.892262 | -311.70905  | -311.701483 | -311.823229 |
| NH2-syn.out  | -327.923201 | -327.75092  | -327.743479 | -327.878292 |
| OH-syn.out   | -347.787044 | -347.627659 | -347.620376 | -347.763977 |
| SH-syn.out   | -670.751012 | -670.596496 | -670.588858 | -670.73407  |
| SiH3-Syn.out | -563.239758 | -563.069507 | -563.061008 | -563.202528 |

|            |             |             |             |             |
|------------|-------------|-------------|-------------|-------------|
| H-anti.out | -272.597907 | -272.443039 | -272.436915 | -272.544593 |
|------------|-------------|-------------|-------------|-------------|

#### **Anti-Adducts**

|               |              |             |              |              |
|---------------|--------------|-------------|--------------|--------------|
| Br-anti.out   | -2843.782811 | -2843.63791 | -2843.630459 | -2846.133423 |
| Cl-anti.out   | -732.169293  | -732.023736 | -732.016493  | -732.159173  |
| F-Anti.out    | -371.8018    | -371.654706 | -371.64778   | -371.795863  |
| Me-anti.out   | -311.892054  | -311.708834 | -311.701278  | -311.822517  |
| NH2-anti.out  | -327.922572  | -327.750084 | -327.742748  | -327.876861  |
| OH-anti.out   | -347.787421  | -347.627684 | -347.620582  | -347.763496  |
| SH-anti.out   | -670.75056   | -670.596369 | -670.588632  | -670.733565  |
| SiH3-Anti.out | -563.240425  | -563.070392 | -563.061752  | -563.203134  |

#### **Cyclopentanes**

|          |              |              |              |            |
|----------|--------------|--------------|--------------|------------|
| H.out    | -196.447889  | -196.305257  | -196.29915   | -196.3874  |
| Br.out   | -2767.637808 | -2767.504747 | -2767.497652 | -2769.9808 |
| Cl.out   | -656.0233    | -655.889462  | -655.882631  | -656.0066  |
| F.out    | -295.65584   | -295.520683  | -295.514081  | -295.6435  |
| Me.out   | -235.743271  | -235.572508  | -235.565018  | -235.6674  |
| NH2.out  | -251.771502  | -251.611496  | -251.604229  | -251.7197  |
| OH.out   | -271.634355  | -271.487219  | -271.480112  | -271.6051  |
| SH.out   | -594.601079  | -594.45881   | -594.45127   | -594.5773  |
| SiH3.out | -487.092042  | -486.934788  | -486.92633   | -487.0488  |

### Cyclopentenes

|          |              |              |              |              |
|----------|--------------|--------------|--------------|--------------|
| H.out    | -195.224083  | -195.105593  | -195.100052  | -195.187265  |
| Br.out   | -2766.412438 | -2766.303525 | -2766.296928 | -2768.779942 |
| Cl.out   | -654.797927  | -654.688335  | -654.68189   | -654.804778  |
| F.out    | -294.428892  | -294.318024  | -294.311817  | -294.440509  |
| Me.out   | -234.518775  | -234.372008  | -234.365121  | -234.46648   |
| NH2.out  | -250.547658  | -250.411719  | -250.405036  | -250.519211  |
| OH.out   | -270.410813  | -270.287572  | -270.281035  | -270.404831  |
| SH.out   | -593.377729  | -593.259283  | -593.252392  | -593.377336  |
| SiH3.out | -485.869208  | -485.73546   | -485.727782  | -485.848613  |

|           |              |  |  |          |
|-----------|--------------|--|--|----------|
| Acetylene | -77.28777146 |  |  | -78.5334 |
|-----------|--------------|--|--|----------|

**TS-Syn-Actylene**

|          |              |              |              |              |
|----------|--------------|--------------|--------------|--------------|
| Br.out   | -2765.184849 | -2765.100437 | -2765.094186 | -2767.576083 |
| Cl.out   | -653.569647  | -653.484463  | -653.478395  | -653.599363  |
| F.out    | -293.197241  | -293.110798  | -293.105029  | -293.231691  |
| Me.out   | -233.298065  | -233.17513   | -233.168749  | -233.26869   |
| NH2.out  | -249.322657  | -249.210834  | -249.204573  | -249.317346  |
| OH.out   | -269.183262  | -269.084431  | -269.078293  | -269.200273  |
| SH.out   | -592.154788  | -592.061163  | -592.054479  | -592.178282  |
| SiH3.out | -484.658123  | -484.549202  | -484.54177   | -484.661515  |

**TS-Anti-Actylene**

|         |              |              |              |              |
|---------|--------------|--------------|--------------|--------------|
| Br.out  | -2842.447199 | -2842.332885 | -2842.324577 | -2844.916825 |
| Cl.out  | -730.831669  | -730.716704  | -730.708592  | -730.942168  |
| F.out   | -370.459932  | -370.343673  | -370.335873  | -370.577647  |
| Me.out  | -310.557173  | -310.404394  | -310.39607   | -310.646876  |
| NH2.out | -326.58334   | -326.441667  | -326.433463  | -326.686231  |
| OH.out  | -346.445894  | -346.317267  | -346.309187  | -346.558153  |



|          |             |             |             |             |
|----------|-------------|-------------|-------------|-------------|
| SH.out   | -669.415058 | -669.291292 | -669.282744 | -669.527327 |
| SiH3.out | -561.914981 | -561.775077 | -561.766022 | -562.021361 |
| MA.out   | -379.143394 | -379.086564 | -379.080471 | -379.2301   |

**TS-Syn-MA**

|          |              |              |              |              |
|----------|--------------|--------------|--------------|--------------|
| Br.out   | -3144.324166 | -3144.180562 | -3144.169371 | -3146.879714 |
| Cl.out   | -1032.70885  | -1032.564512 | -1032.553504 | -1032.907952 |
| F.out    | -672.345568  | -672.199547  | -672.188903  | -672.549056  |
| Me.out   | -612.435487  | -612.253334  | -612.241944  | -612.613678  |
| NH-1.out | -628.465548  | -628.294579  | -628.28339   | -628.656338  |
| OH-1.out | -648.328058  | -648.169933  | -648.158899  | -648.528132  |
| SH-1.out | -971.290206  | -971.136792  | -971.125366  | -971.491268  |
| SiH3.out | -863.783702  | -863.615256  | -863.602835  | -863.979395  |

**TS-Anti-MA**

|        |              |              |              |              |
|--------|--------------|--------------|--------------|--------------|
| Br.out | -3144.320234 | -3144.176222 | -3144.164914 | -3146.770661 |
| Cl.out | -1032.704442 | -1032.559767 | -1032.548674 | -1032.794369 |
| F.out  | -672.333122  | -672.186969  | -672.176199  | -672.427049  |
| Me.out | -612.435461  | -612.253049  | -612.241693  | -612.466246  |

|          |             |             |             |             |
|----------|-------------|-------------|-------------|-------------|
| NH.out   | -628.459906 | -628.288499 | -628.277296 | -628.514363 |
| OH.out   | -648.320341 | -648.161764 | -648.150727 | -648.39672  |
| SH.out   | -971.289969 | -971.136258 | -971.124785 | -971.372726 |
| SiH3.out | -863.792946 | -863.623727 | -863.611517 | -863.855344 |

|          |             |             |            |           |
|----------|-------------|-------------|------------|-----------|
| TCNE.out | -447.355429 | -447.307642 | -447.29757 | -447.4603 |
|----------|-------------|-------------|------------|-----------|

### **TS-Syn-TCNE**

|          |              |              |              |              |
|----------|--------------|--------------|--------------|--------------|
| Br.out   | -3212.532606 | -3212.398867 | -3212.383475 | -3214.998944 |
| Cl.out   | -1100.916095 | -1100.781629 | -1100.766496 | -1101.026455 |
| F.out    | -740.557634  | -740.421139  | -740.406392  | -740.667909  |
| Me.out   | -680.650934  | -680.478286  | -680.46285   | -680.70187   |
| NH2.out  | -696.684245  | -696.522815  | -696.507641  | -696.757346  |
| OH.out   | -716.54476   | -716.396171  | -716.381141  | -716.639397  |
| SH.out   | -1039.499155 | -1039.35582  | -1039.340153 | -1039.603099 |
| SiH3.out | -931.99878   | -931.839638  | -931.823306  | -932.081486  |

### **TS-Anti-TCNE**

|        |              |              |              |              |
|--------|--------------|--------------|--------------|--------------|
| Br.out | -3212.536073 | -3212.401791 | -3212.386245 | -3215.006263 |
| Cl.out | -1100.91949  | -1100.784554 | -1100.769247 | -1101.029698 |

|          |              |              |              |              |
|----------|--------------|--------------|--------------|--------------|
| F.out    | -740.547335  | -740.410902  | -740.39593   | -740.661036  |
| Me.out   | -680.655861  | -680.483041  | -680.467515  | -680.706681  |
| NH2.out  | -696.677746  | -696.515987  | -696.500585  | -696.752158  |
| OH.out   | -716.535088  | -716.386302  | -716.371042  | -716.631388  |
| SH.out   | -1039.507181 | -1039.363335 | -1039.347614 | -1039.610416 |
| SiH3.out | -932.014688  | -931.855018  | -931.838623  | -932.097151  |
| TAD.out  | -391.325496  | -391.280531  | -391.274385  | -391.4283    |

**TS-Syn-TAD**

|          |              |              |              |              |
|----------|--------------|--------------|--------------|--------------|
| Br.out   | -3156.512587 | -3156.380714 | -3156.369486 | -3158.977822 |
| Cl.out   | -1044.89797  | -1044.765276 | -1044.754236 | -1045.003778 |
| F.out    | -684.532799  | -684.39862   | -684.387937  | -684.641122  |
| CH3.out  | -624.632388  | -624.461926  | -624.45047   | -624.679684  |
| NH.out   | -640.663072  | -640.503621  | -640.492363  | -640.733298  |
| OH.out   | -660.527101  | -660.380429  | -660.369383  | -660.618192  |
| SH.out   | -983.486825  | -983.345158  | -983.333627  | -983.585562  |
| SiH3.out | -875.98234   | -875.825324  | -875.813084  | -876.061125  |

**TS-Anti-TAD**

|          |              |              |              |              |
|----------|--------------|--------------|--------------|--------------|
| Br.out   | -3156.514175 | -3156.382047 | -3156.370654 | -3158.980556 |
| Cl.out   | -1044.898415 | -1044.765646 | -1044.75446  | -1045.0044   |
| F.out    | -684.526847  | -684.392528  | -684.381677  | -684.636481  |
| CH3.out  | -624.630368  | -624.459874  | -624.448404  | -624.677297  |
| NH2.out  | -640.654034  | -640.494488  | -640.483189  | -640.724564  |
| OH.out   | -660.513417  | -660.3668    | -660.355648  | -660.605837  |
| SH.out   | -983.484448  | -983.342659  | -983.33108   | -983.58338   |
| SiH3.out | -875.987845  | -875.830388  | -875.818131  | -876.066299  |
